# Supplementary material for: Autonomy in Relatedness: How Need Fulfillment Interacts in Close Relationships
Source: PubMed Central journal article supplement — Pers Soc Psychol Bull. 2019 Aug 8;46(4):603–16. doi: 10.1177/0146167219867964 (PMC7057354; doi:10.1177/0146167219867964), 2019-08-08
Supplement: Kluwer_OnlineAppendix.pdf [file Kluwer_OnlineAppendix.pdf]

## Questionnaires (stimulus materials)

### Questionnaire Study 1 (verbatim as programmed in LimeSurvey, in Dutch)

#### Onderzoek partnerrelaties

Deze online vragenlijst maakt deel uit van een onderzoeksprogramma naar partnerrelaties van de Universiteit Utrecht. Het invullen van deze vragenlijst zal ongeveer een kwartier in beslag nemen. We willen met deze vragenlijst graag meer te weten komen over hoe u de relatie met uw partner ervaart. U behoort tot de doelgroep als u minimaal 18 jaar bent en een partnerrelatie heeft van minimaal 1 jaar. Het is belangrijk dat u de vragen goed doorleest en eerlijk invult. Denk niet te lang over een vraag na, maar vul in wat het eerste in u opkomt. Bij het beantwoorden van de vragen gaat het erom wat u vindt, dus er is geen goed of fout antwoord.

Uiteraard zal bij het invullen van deze vragenlijst uw anonimiteit gewaarborgd worden; er wordt niet naar uw naam of andere identificerende informatie gevraagd. De gegevens die in dit onderzoek verzameld worden, zullen vertrouwelijk behandeld worden. Deelname aan dit onderzoek is vrijwillig; u kunt uw deelname op elk gewenst moment stoppen.

Onder de deelnemers worden 4 [bol.com](http://bol.com) cadeaubonnen ter waarde van 25 euro verloot. De bonnen worden verloot onder deelnemers die de vragenlijst volledig en serieus invullen. Indien u hier kans op wilt maken, kunt u aan het einde van de vragenlijst uw e-mailadres invullen. Dit e-mailadres wordt alleen gebruikt voor het verzenden van de cadeaubon indien u deze gewonnen heeft.

Bij voorbaat hartelijk dank voor uw deelname.

#### Toestemmingsverklaring

**Ik geef toestemming voor het (anonieme) gebruik van mijn gegevens voor wetenschappelijk onderzoek en ga naar de vragenlijst.**

Ja, ik geef toestemming en ga naar de vragenlijst

## Algemene vragen

### 1. Wat is uw geslacht?

Kies één van de volgende mogelijkheden:

- Man
- Vrouw

### 2. Wat is uw leeftijd in jaren?

In dit veld mogen alleen cijfers ingevoerd worden.

Vul uw antwoord hier in:

### 3. Wat is het geslacht van uw partner?

Kies één van de volgende mogelijkheden:

- Man
- Vrouw

### 4. Hoeveel jaren heeft u deze relatie? Dit graag invullen in hele of halve jaren.

In dit veld mogen alleen cijfers ingevoerd worden.

Vul uw antwoord hier in:

5. **Wat is uw burgerlijke staat?** Kies één van de volgende mogelijkheden:

- Gehuwd en samenwonend
- Ongehuwd en samenwonend
- Gehuwd en niet samenwonend
- Ongehuwd en niet samenwonend

6. **Hoeveel kinderen heeft u?** Kies één van de volgende mogelijkheden:

- 0
- 1
- 2
- 3
- 4
- 5
- 6

7. **Wat is uw hoogst genoten opleiding?** Kies één van de volgende mogelijkheden:

- Basisschool
- Lager beroepsonderwijs (LBO)
- M.U.L.O/M.A.V.O/V.M.B.O
- Middelbaar beroepsonderwijs (MBO)
- H.B.S./H.A.V.O./V.W.O.
- Hoger beroepsonderwijs (HBO)
- Wetenschappelijk onderwijs (WO)

8. **Heeft u betaald werk?** Kies één van de volgende mogelijkheden:

- Ja
- Nee

9. **Studeert u?** Kies één van de volgende mogelijkheden:

- Ja
- Nee

10. **Hoeveel uur per week besteedt u aan betaald werk (indien van toepassing: volgens uw arbeidscontract)?**

Vul uw antwoord hier in:

11. **Wat is naar schatting uw huidige, individuele netto (besteedbaar) inkomen per jaar?** Kies één van de volgende mogelijkheden:

- Minder dan 10.000 euro
- 10.000 tot 20.000 euro
- 20.000 tot 30.000 euro
- 30.000 tot 40.000 euro
- 40.000 tot 50.000 euro
- 50.000 euro of meer

## 12. Wat is uw geloofsovertuiging?

Indien u 'Andere:' kiest, licht deze keuze dan toe in het bijbehorende tekstvak.

Kies één van de volgende mogelijkheden:

- Geen
- Rooms-katholiek
- Protestants
- Islamitisch
- Joods
- Hindoeïstisch
- Boeddhistisch
- Andere

Indien antwoord ONGELIJK 'Geen' bij vraag '13 [I]' (Wat is uw geloofsovertuiging?):

**12a. Hoe vaak bezoekt u de kerk, een religieuze dienst of bijeenkomst?** Kies één van de volgende mogelijkheden:

- Eén keer per week of vaker
- Twee tot drie keer per maand
- Eén keer per maand
- Minder dan één keer per maand
- Zelden of nooit

Indien antwoord ONGELIJK 'Geen' bij vraag '13 [I]' (Wat is uw geloofsovertuiging?):

**12b. De volgende vragen gaan over in hoeverre uw geloof belangrijk voor u is. Er volgen een aantal stellingen. Geef bij elke stelling aan in hoeverre u het ermee eens of oneens bent.**

Kies het toepasselijke antwoord voor elk onderdeel:

|                                                                             | helemaal<br>mee<br>oneens | mee oneens            | een beetje<br>mee oneens | niet mee<br>oneens/ niet<br>mee eens | een beetje<br>mee eens | mee eens              | helemaal mee<br>eens  |
|-----------------------------------------------------------------------------|---------------------------|-----------------------|--------------------------|--------------------------------------|------------------------|-----------------------|-----------------------|
| Ik zie mijzelf als een gelovig persoon                                      | <input type="radio"/>     | <input type="radio"/> | <input type="radio"/>    | <input type="radio"/>                | <input type="radio"/>  | <input type="radio"/> | <input type="radio"/> |
| Mijn geloof is belangrijk voor mij                                          | <input type="radio"/>     | <input type="radio"/> | <input type="radio"/>    | <input type="radio"/>                | <input type="radio"/>  | <input type="radio"/> | <input type="radio"/> |
| Mijn geloof speelt een grote rol als ik belangrijke beslissingen moet nemen | <input type="radio"/>     | <input type="radio"/> | <input type="radio"/>    | <input type="radio"/>                | <input type="radio"/>  | <input type="radio"/> | <input type="radio"/> |
| Zonder mijn geloof zou ik niet kunnen leven                                 | <input type="radio"/>     | <input type="radio"/> | <input type="radio"/>    | <input type="radio"/>                | <input type="radio"/>  | <input type="radio"/> | <input type="radio"/> |
| Mijn geloofsovertuiging heeft veel invloed op mijn alledaagse leven         | <input type="radio"/>     | <input type="radio"/> | <input type="radio"/>    | <input type="radio"/>                | <input type="radio"/>  | <input type="radio"/> | <input type="radio"/> |

**13. De volgende stellingen gaan over hoe u zich doorgaans voelt binnen de relatie met uw partner. Geef bij elke stelling aan in hoeverre u het ermee eens of oneens bent.**

**In mijn relatie...**

Kies het toepasselijke antwoord voor elk onderdeel:

|                                                                                 | helemaal<br>mee<br>oneens | mee oneens            | een beetje<br>mee oneens | niet mee<br>oneens/ niet<br>mee eens | een beetje<br>mee eens | mee eens              | helemaal mee<br>eens  |
|---------------------------------------------------------------------------------|---------------------------|-----------------------|--------------------------|--------------------------------------|------------------------|-----------------------|-----------------------|
| Voel ik me vrij om te zijn wie ik ben.                                          | <input type="radio"/>     | <input type="radio"/> | <input type="radio"/>    | <input type="radio"/>                | <input type="radio"/>  | <input type="radio"/> | <input type="radio"/> |
| Heb ik een stem in wat er in mijn relatie gebeurt.                              | <input type="radio"/>     | <input type="radio"/> | <input type="radio"/>    | <input type="radio"/>                | <input type="radio"/>  | <input type="radio"/> | <input type="radio"/> |
| Voel ik me geliefd.                                                             | <input type="radio"/>     | <input type="radio"/> | <input type="radio"/>    | <input type="radio"/>                | <input type="radio"/>  | <input type="radio"/> | <input type="radio"/> |
| Voel ik dat mijn partner om mij geeft.                                          | <input type="radio"/>     | <input type="radio"/> | <input type="radio"/>    | <input type="radio"/>                | <input type="radio"/>  | <input type="radio"/> | <input type="radio"/> |
| Voel ik me gecontroleerd en onder druk gezet om op een bepaalde manier te zijn. | <input type="radio"/>     | <input type="radio"/> | <input type="radio"/>    | <input type="radio"/>                | <input type="radio"/>  | <input type="radio"/> | <input type="radio"/> |
| Voel ik veel afstand naar mijn partner.                                         | <input type="radio"/>     | <input type="radio"/> | <input type="radio"/>    | <input type="radio"/>                | <input type="radio"/>  | <input type="radio"/> | <input type="radio"/> |
| Voel ik me vrij om mijn eigen beslissingen te nemen.                            | <input type="radio"/>     | <input type="radio"/> | <input type="radio"/>    | <input type="radio"/>                | <input type="radio"/>  | <input type="radio"/> | <input type="radio"/> |

|                                                                               | helemaal<br>mee<br>oneens | mee oneens            | een beetje<br>mee oneens | niet mee<br>oneens/ niet<br>mee eens | een beetje<br>mee eens | mee eens              | helemaal mee<br>eens  |
|-------------------------------------------------------------------------------|---------------------------|-----------------------|--------------------------|--------------------------------------|------------------------|-----------------------|-----------------------|
| Voel ik me verbonden met mijn partner.                                        | <input type="radio"/>     | <input type="radio"/> | <input type="radio"/>    | <input type="radio"/>                | <input type="radio"/>  | <input type="radio"/> | <input type="radio"/> |
| Kan ik mijzelf zijn in dagelijkse situaties.                                  | <input type="radio"/>     | <input type="radio"/> | <input type="radio"/>    | <input type="radio"/>                | <input type="radio"/>  | <input type="radio"/> | <input type="radio"/> |
| Voel ik me vrij om mijn gevoelens, ideeën en mening te uiten.                 | <input type="radio"/>     | <input type="radio"/> | <input type="radio"/>    | <input type="radio"/>                | <input type="radio"/>  | <input type="radio"/> | <input type="radio"/> |
| Voelt het alsof ik me anders moet voordoen dan wie ik daadwerkelijk ben.      | <input type="radio"/>     | <input type="radio"/> | <input type="radio"/>    | <input type="radio"/>                | <input type="radio"/>  | <input type="radio"/> | <input type="radio"/> |
| Voel ik me vrij om dingen voor mezelf te doen als ik daar behoefte aan heb.   | <input type="radio"/>     | <input type="radio"/> | <input type="radio"/>    | <input type="radio"/>                | <input type="radio"/>  | <input type="radio"/> | <input type="radio"/> |
| Voel ik me close met mijn partner.                                            | <input type="radio"/>     | <input type="radio"/> | <input type="radio"/>    | <input type="radio"/>                | <input type="radio"/>  | <input type="radio"/> | <input type="radio"/> |
| Voelt het alsof mijn partner verwacht dat ik alles doe zoals hij/zij het wil. | <input type="radio"/>     | <input type="radio"/> | <input type="radio"/>    | <input type="radio"/>                | <input type="radio"/>  | <input type="radio"/> | <input type="radio"/> |
| Voelt het alsof mijn partner altijd het                                       | <input type="radio"/>     | <input type="radio"/> | <input type="radio"/>    | <input type="radio"/>                | <input type="radio"/>  | <input type="radio"/> | <input type="radio"/> |



|                                                                      | helemaal<br>mee<br>oneens | mee oneens            | een beetje<br>mee oneens | niet mee<br>oneens/ niet<br>mee eens | een beetje<br>mee eens | mee eens              | helemaal mee<br>eens  |
|----------------------------------------------------------------------|---------------------------|-----------------------|--------------------------|--------------------------------------|------------------------|-----------------------|-----------------------|
| laatste woord heeft<br>over hoe wij dingen<br>doen in de relatie.    |                           |                       |                          |                                      |                        |                       |                       |
| Voelt het alsof mijn<br>partner mij echt<br>begrijpt.                | <input type="radio"/>     | <input type="radio"/> | <input type="radio"/>    | <input type="radio"/>                | <input type="radio"/>  | <input type="radio"/> | <input type="radio"/> |
| Voel ik me vrij om<br>te bepalen wat ik<br>doe en hoe ik het<br>doe. | <input type="radio"/>     | <input type="radio"/> | <input type="radio"/>    | <input type="radio"/>                | <input type="radio"/>  | <input type="radio"/> | <input type="radio"/> |
| Voel ik veel<br>hechtheid en<br>intimiteit met mijn<br>partner.      | <input type="radio"/>     | <input type="radio"/> | <input type="radio"/>    | <input type="radio"/>                | <input type="radio"/>  | <input type="radio"/> | <input type="radio"/> |

**14. Geef bij elke stelling aan in hoeverre u het ermee eens of oneens bent.**

**Wanneer ik met mijn partner ben:**

Kies het toepasselijke antwoord voor elk onderdeel:

|                                                                      | helemaal<br>mee<br>oneens | mee oneens            | een beetje<br>mee oneens | niet mee<br>oneens/ niet<br>mee eens | een beetje<br>mee eens | mee eens              | helemaal mee<br>eens  |
|----------------------------------------------------------------------|---------------------------|-----------------------|--------------------------|--------------------------------------|------------------------|-----------------------|-----------------------|
| Kan ik praten over dingen die erg belangrijk zijn voor mij.          | <input type="radio"/>     | <input type="radio"/> | <input type="radio"/>    | <input type="radio"/>                | <input type="radio"/>  | <input type="radio"/> | <input type="radio"/> |
| Heb ik het gevoel dat ik hem/haar alles kan vertellen.               | <input type="radio"/>     | <input type="radio"/> | <input type="radio"/>    | <input type="radio"/>                | <input type="radio"/>  | <input type="radio"/> | <input type="radio"/> |
| Kan ik openlijk mijn diepste gedachten en gevoelens delen.           | <input type="radio"/>     | <input type="radio"/> | <input type="radio"/>    | <input type="radio"/>                | <input type="radio"/>  | <input type="radio"/> | <input type="radio"/> |
| Kan ik mijn gevoelens uiten zonder dat mijn partner defensief wordt. | <input type="radio"/>     | <input type="radio"/> | <input type="radio"/>    | <input type="radio"/>                | <input type="radio"/>  | <input type="radio"/> | <input type="radio"/> |
| Kan ik mijn gelukkige gevoelens uiten.                               | <input type="radio"/>     | <input type="radio"/> | <input type="radio"/>    | <input type="radio"/>                | <input type="radio"/>  | <input type="radio"/> | <input type="radio"/> |

|                                                                                          | helemaal<br>mee<br>oneens | mee oneens            | een beetje<br>mee oneens | niet mee<br>oneens/ niet<br>mee eens | een beetje<br>mee eens | mee eens              | helemaal mee<br>eens  |
|------------------------------------------------------------------------------------------|---------------------------|-----------------------|--------------------------|--------------------------------------|------------------------|-----------------------|-----------------------|
| Kan ik mijn<br>jaloerse gevoelens<br>uiten.                                              | <input type="radio"/>     | <input type="radio"/> | <input type="radio"/>    | <input type="radio"/>                | <input type="radio"/>  | <input type="radio"/> | <input type="radio"/> |
| Kan ik mijn boze<br>gevoelens uiten.                                                     | <input type="radio"/>     | <input type="radio"/> | <input type="radio"/>    | <input type="radio"/>                | <input type="radio"/>  | <input type="radio"/> | <input type="radio"/> |
| Kan ik mijn<br>teleurstelling over<br>iets wat mijn<br>partner heeft<br>gedaan delen.    | <input type="radio"/>     | <input type="radio"/> | <input type="radio"/>    | <input type="radio"/>                | <input type="radio"/>  | <input type="radio"/> | <input type="radio"/> |
| Kan ik mijn<br>gevoelens delen<br>nadat ik ben<br>bekritiseerd door<br>mijn partner.     | <input type="radio"/>     | <input type="radio"/> | <input type="radio"/>    | <input type="radio"/>                | <input type="radio"/>  | <input type="radio"/> | <input type="radio"/> |
| Heb ik het gevoel<br>dat mijn gedachten<br>en gevoelens<br>worden begrepen<br>en erkend. | <input type="radio"/>     | <input type="radio"/> | <input type="radio"/>    | <input type="radio"/>                | <input type="radio"/>  | <input type="radio"/> | <input type="radio"/> |
| Luistert mijn<br>partner naar mij<br>wanneer ik iemand<br>nodig heb om mee<br>te praten. | <input type="radio"/>     | <input type="radio"/> | <input type="radio"/>    | <input type="radio"/>                | <input type="radio"/>  | <input type="radio"/> | <input type="radio"/> |

|                                                                  | helemaal<br>mee<br>oneens | mee oneens            | een beetje<br>mee oneens | niet mee<br>oneens/ niet<br>mee eens | een beetje<br>mee eens | mee eens              | helemaal mee<br>eens  |
|------------------------------------------------------------------|---------------------------|-----------------------|--------------------------|--------------------------------------|------------------------|-----------------------|-----------------------|
| Begrijpt mijn partner echt mijn pijnlijke en gelukkige momenten. | <input type="radio"/>     | <input type="radio"/> | <input type="radio"/>    | <input type="radio"/>                | <input type="radio"/>  | <input type="radio"/> | <input type="radio"/> |
| Probeert mijn partner te begrijpen hoe ik de dingen zie.         | <input type="radio"/>     | <input type="radio"/> | <input type="radio"/>    | <input type="radio"/>                | <input type="radio"/>  | <input type="radio"/> | <input type="radio"/> |

**15. De volgende vragen gaan over uzelf en over hoe u in de relatie staat. Geef bij elke stelling aan in hoeverre u het ermee eens of oneens bent.**

Kies het toepasselijke antwoord voor elk onderdeel:

|                                                                                    | helemaal<br>mee<br>oneens | mee oneens            | een beetje<br>mee oneens | niet mee<br>oneens/ niet<br>mee eens | een beetje<br>mee eens | mee eens              | helemaal mee<br>eens  |
|------------------------------------------------------------------------------------|---------------------------|-----------------------|--------------------------|--------------------------------------|------------------------|-----------------------|-----------------------|
| Soms voelt het alsof ik in een emotionele achtbaan zit.                            | <input type="radio"/>     | <input type="radio"/> | <input type="radio"/>    | <input type="radio"/>                | <input type="radio"/>  | <input type="radio"/> | <input type="radio"/> |
| Ik heb moeite met het uiten van mijn diepste gevoelens en wensen aan mijn partner. | <input type="radio"/>     | <input type="radio"/> | <input type="radio"/>    | <input type="radio"/>                | <input type="radio"/>  | <input type="radio"/> | <input type="radio"/> |

|                                                                                           | helemaal<br>mee<br>oneens | mee oneens            | een beetje<br>mee oneens | niet mee<br>oneens/<br>niet<br>mee eens | een beetje<br>mee eens | mee eens              | helemaal mee<br>eens  |
|-------------------------------------------------------------------------------------------|---------------------------|-----------------------|--------------------------|-----------------------------------------|------------------------|-----------------------|-----------------------|
| Ik zou nooit overwegen om naar een van mijn familieleden te gaan voor emotionele steun.   | <input type="radio"/>     | <input type="radio"/> | <input type="radio"/>    | <input type="radio"/>                   | <input type="radio"/>  | <input type="radio"/> | <input type="radio"/> |
| Ik blijf meestal (behoorlijk) rustig, zelfs onder stress.                                 | <input type="radio"/>     | <input type="radio"/> | <input type="radio"/>    | <input type="radio"/>                   | <input type="radio"/>  | <input type="radio"/> | <input type="radio"/> |
| Ik heb meestal veel aanmoediging nodig van mijn partner wanneer ik aan iets nieuws begin. | <input type="radio"/>     | <input type="radio"/> | <input type="radio"/>    | <input type="radio"/>                   | <input type="radio"/>  | <input type="radio"/> | <input type="radio"/> |
| Wanneer mijn partner mij teleurstelt, trek ik mij een tijdje van hem/haar terug.          | <input type="radio"/>     | <input type="radio"/> | <input type="radio"/>    | <input type="radio"/>                   | <input type="radio"/>  | <input type="radio"/> | <input type="radio"/> |
| Wat er ook gebeurt in mijn leven, ik weet dat ik nooit het gevoel verlies van wie ik ben. | <input type="radio"/>     | <input type="radio"/> | <input type="radio"/>    | <input type="radio"/>                   | <input type="radio"/>  | <input type="radio"/> | <input type="radio"/> |
| Wanneer mijn relatie te hecht wordt, heb ik de neiging om afstand te nemen.               | <input type="radio"/>     | <input type="radio"/> | <input type="radio"/>    | <input type="radio"/>                   | <input type="radio"/>  | <input type="radio"/> | <input type="radio"/> |
| Ik probeer de verwachtingen die mijn                                                      | <input type="radio"/>     | <input type="radio"/> | <input type="radio"/>    | <input type="radio"/>                   | <input type="radio"/>  | <input type="radio"/> | <input type="radio"/> |

|                                                                                                                                                            | helemaal<br>mee<br>oneens | mee oneens            | een beetje<br>mee oneens | niet mee<br>oneens/ niet<br>mee eens | een beetje<br>mee eens | mee eens              | helemaal mee<br>eens  |
|------------------------------------------------------------------------------------------------------------------------------------------------------------|---------------------------|-----------------------|--------------------------|--------------------------------------|------------------------|-----------------------|-----------------------|
| ouders van mij hebben<br>waar te maken.                                                                                                                    |                           |                       |                          |                                      |                        |                       |                       |
| Soms krijgen mijn<br>gevoelens de overhand<br>en heb ik moeite om<br>helder na te denken.                                                                  | <input type="radio"/>     | <input type="radio"/> | <input type="radio"/>    | <input type="radio"/>                | <input type="radio"/>  | <input type="radio"/> | <input type="radio"/> |
| Ik verander mijn gedrag<br>niet simpelweg om mijn<br>partner tevreden te<br>stellen.                                                                       | <input type="radio"/>     | <input type="radio"/> | <input type="radio"/>    | <input type="radio"/>                | <input type="radio"/>  | <input type="radio"/> | <input type="radio"/> |
| Ik voel me vaak<br>ongemakkelijk wanneer<br>mijn partner te dichtbij<br>komt.                                                                              | <input type="radio"/>     | <input type="radio"/> | <input type="radio"/>    | <input type="radio"/>                | <input type="radio"/>  | <input type="radio"/> | <input type="radio"/> |
| Wanneer mijn partner<br>mij bekritiseert, trek ik<br>mij dat persoonlijk aan.                                                                              | <input type="radio"/>     | <input type="radio"/> | <input type="radio"/>    | <input type="radio"/>                | <input type="radio"/>  | <input type="radio"/> | <input type="radio"/> |
| Ik ben overgevoelig<br>voor kritiek.                                                                                                                       | <input type="radio"/>     | <input type="radio"/> | <input type="radio"/>    | <input type="radio"/>                | <input type="radio"/>  | <input type="radio"/> | <input type="radio"/> |
| Als ik een<br>woordenwisseling heb<br>met mijn partner, kan ik<br>mijn gedachten over het<br>probleem scheiden van<br>mijn gevoelens voor<br>mijn partner. | <input type="radio"/>     | <input type="radio"/> | <input type="radio"/>    | <input type="radio"/>                | <input type="radio"/>  | <input type="radio"/> | <input type="radio"/> |

|                                                                                              | helemaal<br>mee<br>oneens | mee oneens            | een beetje<br>mee oneens | niet mee<br>oneens/<br>niet<br>mee eens | een beetje<br>mee eens | mee eens              | helemaal mee<br>eens  |
|----------------------------------------------------------------------------------------------|---------------------------|-----------------------|--------------------------|-----------------------------------------|------------------------|-----------------------|-----------------------|
| Wanneer mijn relatie erg intens wordt, voel ik de neiging om ervoor weg te rennen.           | <input type="radio"/>     | <input type="radio"/> | <input type="radio"/>    | <input type="radio"/>                   | <input type="radio"/>  | <input type="radio"/> | <input type="radio"/> |
| Ik heb veel behoefte aan goedkeuring van mijn partner.                                       | <input type="radio"/>     | <input type="radio"/> | <input type="radio"/>    | <input type="radio"/>                   | <input type="radio"/>  | <input type="radio"/> | <input type="radio"/> |
| Ik vraag me vaak af wat voor indruk ik maak.                                                 | <input type="radio"/>     | <input type="radio"/> | <input type="radio"/>    | <input type="radio"/>                   | <input type="radio"/>  | <input type="radio"/> | <input type="radio"/> |
| Het heeft geen zin om van streek te raken over dingen die ik niet kan veranderen.            | <input type="radio"/>     | <input type="radio"/> | <input type="radio"/>    | <input type="radio"/>                   | <input type="radio"/>  | <input type="radio"/> | <input type="radio"/> |
| Ik ben bezorgd over het verliezen van mijn onafhankelijkheid in mijn relatie.                | <input type="radio"/>     | <input type="radio"/> | <input type="radio"/>    | <input type="radio"/>                   | <input type="radio"/>  | <input type="radio"/> | <input type="radio"/> |
| Ik ben er erg gevoelig voor om gekwetst te worden door mijn partner.                         | <input type="radio"/>     | <input type="radio"/> | <input type="radio"/>    | <input type="radio"/>                   | <input type="radio"/>  | <input type="radio"/> | <input type="radio"/> |
| Ik vind het belangrijk om de mening van mijn ouders te horen voordat ik een beslissing maak. | <input type="radio"/>     | <input type="radio"/> | <input type="radio"/>    | <input type="radio"/>                   | <input type="radio"/>  | <input type="radio"/> | <input type="radio"/> |

|                                                                                                                     | helemaal<br>mee<br>oneens | mee oneens            | een beetje<br>mee oneens | niet mee<br>oneens/ niet<br>mee eens | een beetje<br>mee eens | mee eens              | helemaal mee<br>eens  |
|---------------------------------------------------------------------------------------------------------------------|---------------------------|-----------------------|--------------------------|--------------------------------------|------------------------|-----------------------|-----------------------|
| Het voelt voor mij vaak alsof mijn partner teveel van mij wil.                                                      | <input type="radio"/>     | <input type="radio"/> | <input type="radio"/>    | <input type="radio"/>                | <input type="radio"/>  | <input type="radio"/> | <input type="radio"/> |
| Ik ben het vaak eens met mijn partner, simpelweg om hem/haar tevreden te stellen.                                   | <input type="radio"/>     | <input type="radio"/> | <input type="radio"/>    | <input type="radio"/>                | <input type="radio"/>  | <input type="radio"/> | <input type="radio"/> |
| Als ik een woordenwisseling heb gehad met mijn partner, kan ik er de hele dag over piekeren.                        | <input type="radio"/>     | <input type="radio"/> | <input type="radio"/>    | <input type="radio"/>                | <input type="radio"/>  | <input type="radio"/> | <input type="radio"/> |
| Ik ben goed in staat om nee te zeggen tegen mijn partner, zelfs wanneer ik mij onder druk gezet voel door hem/haar. | <input type="radio"/>     | <input type="radio"/> | <input type="radio"/>    | <input type="radio"/>                | <input type="radio"/>  | <input type="radio"/> | <input type="radio"/> |
| Als ik met mijn partner ben, voel ik me vaak verstikt.                                                              | <input type="radio"/>     | <input type="radio"/> | <input type="radio"/>    | <input type="radio"/>                | <input type="radio"/>  | <input type="radio"/> | <input type="radio"/> |
| Ik voel me vaak onzeker wanneer mijn partner niet in de buurt is om mij te helpen een beslissing te nemen.          | <input type="radio"/>     | <input type="radio"/> | <input type="radio"/>    | <input type="radio"/>                | <input type="radio"/>  | <input type="radio"/> | <input type="radio"/> |



|                                                                                                              | helemaal<br>mee<br>oneens | mee oneens            | een beetje<br>mee oneens | niet mee<br>oneens/ niet<br>mee eens | een beetje<br>mee eens | mee eens              | helemaal mee<br>eens  |
|--------------------------------------------------------------------------------------------------------------|---------------------------|-----------------------|--------------------------|--------------------------------------|------------------------|-----------------------|-----------------------|
| Als mijn partner boos op mij is, kan ik het heel moeilijk loslaten.                                          | <input type="radio"/>     | <input type="radio"/> | <input type="radio"/>    | <input type="radio"/>                | <input type="radio"/>  | <input type="radio"/> | <input type="radio"/> |
| Ik vind het minder belangrijk dat mijn partner mij goedkeurt dan dat ik doe waarvan ik denk dat het goed is. | <input type="radio"/>     | <input type="radio"/> | <input type="radio"/>    | <input type="radio"/>                | <input type="radio"/>  | <input type="radio"/> | <input type="radio"/> |
| Als dingen fout gaan in mijn relatie, maakt erover praten het meestal alleen maar erger.                     | <input type="radio"/>     | <input type="radio"/> | <input type="radio"/>    | <input type="radio"/>                | <input type="radio"/>  | <input type="radio"/> | <input type="radio"/> |
| Ik maak me vaak zorgen over dat mijn partner ziek, gekwetst of van streek raakt.                             | <input type="radio"/>     | <input type="radio"/> | <input type="radio"/>    | <input type="radio"/>                | <input type="radio"/>  | <input type="radio"/> | <input type="radio"/> |

**16. De volgende stellingen gaan over uw gedachten en gevoelens over uzelf in uw relatie. Beslis in hoeverre u het met de stellingen eens bent.**

Kies het toepasselijke antwoord voor elk onderdeel:

|                                                                                                             | Helemaal<br>mee<br>oneens | Mee oneens            | Een beetje<br>mee oneens | Niet mee<br>oneens, niet<br>mee eens | Een beetje<br>mee eens | Mee eens              | Helemaal mee<br>eens  |
|-------------------------------------------------------------------------------------------------------------|---------------------------|-----------------------|--------------------------|--------------------------------------|------------------------|-----------------------|-----------------------|
| Ik voel me beter over mezelf wanneer het goed gaat tussen mijn partner en mij.                              | <input type="radio"/>     | <input type="radio"/> | <input type="radio"/>    | <input type="radio"/>                | <input type="radio"/>  | <input type="radio"/> | <input type="radio"/> |
| Mijn eigenwaarde wordt beïnvloed wanneer er iets misgaat in mijn relatie.                                   | <input type="radio"/>     | <input type="radio"/> | <input type="radio"/>    | <input type="radio"/>                | <input type="radio"/>  | <input type="radio"/> | <input type="radio"/> |
| Ik voel me beter over mezelf wanneer anderen mij vertellen dat mijn partner en ik een goede relatie hebben. | <input type="radio"/>     | <input type="radio"/> | <input type="radio"/>    | <input type="radio"/>                | <input type="radio"/>  | <input type="radio"/> | <input type="radio"/> |
| Wanneer mijn partner kritiek op mij heeft of teleurgesteld lijkt te zijn in mij, voel                       | <input type="radio"/>     | <input type="radio"/> | <input type="radio"/>    | <input type="radio"/>                | <input type="radio"/>  | <input type="radio"/> | <input type="radio"/> |

|                                                                                                          | Helemaal<br>mee<br>oneens | Mee oneens            | Een beetje<br>mee oneens | Niet mee<br>oneens, niet<br>mee eens | Een beetje<br>mee eens | Mee eens              | Helemaal mee<br>eens  |
|----------------------------------------------------------------------------------------------------------|---------------------------|-----------------------|--------------------------|--------------------------------------|------------------------|-----------------------|-----------------------|
| ik mij heel slecht<br>over mezelf.                                                                       |                           |                       |                          |                                      |                        |                       |                       |
| Ik voel me beter<br>over mezelf<br>wanneer mijn<br>partner en ik<br>emotioneel<br>verbonden zijn.        | <input type="radio"/>     | <input type="radio"/> | <input type="radio"/>    | <input type="radio"/>                | <input type="radio"/>  | <input type="radio"/> | <input type="radio"/> |
| Als mijn relatie<br>morgen zou<br>eindigen, zou ik<br>dat mijn<br>eigenwaarde niet<br>laten beïnvloeden. | <input type="radio"/>     | <input type="radio"/> | <input type="radio"/>    | <input type="radio"/>                | <input type="radio"/>  | <input type="radio"/> | <input type="radio"/> |

**17. Lees elk van de volgende stellingen die betrekking hebben op de manier waarop u reageert op negatief gedrag van uw partner en geef aan in hoeverre u het ermee eens bent.**

**Wanneer mijn partner mij kwetst of beledigt,...**

Kies het toepasselijke antwoord voor elk onderdeel:

|                                                                                | Helemaal<br>mee<br>oneens | Mee oneens            | Een beetje<br>mee oneens | Niet mee<br>oneens, niet<br>mee eens | Een beetje<br>mee eens | Mee eens              | Helemaal mee<br>eens  |
|--------------------------------------------------------------------------------|---------------------------|-----------------------|--------------------------|--------------------------------------|------------------------|-----------------------|-----------------------|
| dreig ik om hem/haar te verlaten.                                              | <input type="radio"/>     | <input type="radio"/> | <input type="radio"/>    | <input type="radio"/>                | <input type="radio"/>  | <input type="radio"/> | <input type="radio"/> |
| ga ik zitten mokken en negeer het probleem.                                    | <input type="radio"/>     | <input type="radio"/> | <input type="radio"/>    | <input type="radio"/>                | <input type="radio"/>  | <input type="radio"/> | <input type="radio"/> |
| wacht ik af tot zijn/haar stemming verandert – die gaat vanzelf over.          | <input type="radio"/>     | <input type="radio"/> | <input type="radio"/>    | <input type="radio"/>                | <input type="radio"/>  | <input type="radio"/> | <input type="radio"/> |
| bespreek ik met mijn partner wat er aan de hand is om een oplossing te vinden. | <input type="radio"/>     | <input type="radio"/> | <input type="radio"/>    | <input type="radio"/>                | <input type="radio"/>  | <input type="radio"/> | <input type="radio"/> |

**18. Wanneer mijn partner zich onaangenaam gedraagt tegenover mij,...**

Kies het toepasselijke antwoord voor elk onderdeel:

|                                                             | Helemaal<br>mee<br>oneens | Mee oneens            | Een beetje<br>mee oneens | Niet mee<br>oneens, niet<br>mee eens | Een beetje<br>mee eens | Mee eens              | Helemaal mee<br>eens  |
|-------------------------------------------------------------|---------------------------|-----------------------|--------------------------|--------------------------------------|------------------------|-----------------------|-----------------------|
| vergeef ik mijn partner en vergeet ik wat er is gebeurd.    | <input type="radio"/>     | <input type="radio"/> | <input type="radio"/>    | <input type="radio"/>                | <input type="radio"/>  | <input type="radio"/> | <input type="radio"/> |
| bespreek ik de situatie op een rustige manier met hem/haar. | <input type="radio"/>     | <input type="radio"/> | <input type="radio"/>    | <input type="radio"/>                | <input type="radio"/>  | <input type="radio"/> | <input type="radio"/> |
| reageer ik op een even onaangename manier.                  | <input type="radio"/>     | <input type="radio"/> | <input type="radio"/>    | <input type="radio"/>                | <input type="radio"/>  | <input type="radio"/> | <input type="radio"/> |
| breng ik minder tijd met hem/haar door.                     | <input type="radio"/>     | <input type="radio"/> | <input type="radio"/>    | <input type="radio"/>                | <input type="radio"/>  | <input type="radio"/> | <input type="radio"/> |

**19. Wanneer mijn partner onattent is of geen rekening houdt met mij,...**

Kies het toepasselijke antwoord voor elk onderdeel:

|                                                                                | Helemaal<br>mee<br>oneens | Mee oneens            | Een beetje<br>mee oneens | Niet mee<br>oneens, niet<br>mee eens | Een beetje<br>mee eens | Mee eens              | Helemaal mee<br>eens  |
|--------------------------------------------------------------------------------|---------------------------|-----------------------|--------------------------|--------------------------------------|------------------------|-----------------------|-----------------------|
| vermijd ik de<br>situatie.                                                     | <input type="radio"/>     | <input type="radio"/> | <input type="radio"/>    | <input type="radio"/>                | <input type="radio"/>  | <input type="radio"/> | <input type="radio"/> |
| wacht ik met<br>geduld af tot de<br>situatie<br>verbetert.                     | <input type="radio"/>     | <input type="radio"/> | <input type="radio"/>    | <input type="radio"/>                | <input type="radio"/>  | <input type="radio"/> | <input type="radio"/> |
| probeer ik de<br>situatie te<br>herstellen en<br>het probleem op<br>te lossen. | <input type="radio"/>     | <input type="radio"/> | <input type="radio"/>    | <input type="radio"/>                | <input type="radio"/>  | <input type="radio"/> | <input type="radio"/> |
| doe ik dingen<br>om mijn partner<br>op afstand te<br>houden.                   | <input type="radio"/>     | <input type="radio"/> | <input type="radio"/>    | <input type="radio"/>                | <input type="radio"/>  | <input type="radio"/> | <input type="radio"/> |

**20. Wanneer mijn partner grof of bot doet tegen mij,...**

Kies het toepasselijke antwoord voor elk onderdeel:

|                                                                         | Helemaal<br>mee<br>oneens | Mee oneens            | Een beetje<br>mee oneens | Niet mee<br>oneens, niet<br>mee eens | Een beetje<br>mee eens | Mee eens              | Helemaal mee<br>eens  |
|-------------------------------------------------------------------------|---------------------------|-----------------------|--------------------------|--------------------------------------|------------------------|-----------------------|-----------------------|
| voel ik mij zo boos dat ik rechtstreeks de deur uit wil lopen.          | <input type="radio"/>     | <input type="radio"/> | <input type="radio"/>    | <input type="radio"/>                | <input type="radio"/>  | <input type="radio"/> | <input type="radio"/> |
| negeer ik de gehele situatie.                                           | <input type="radio"/>     | <input type="radio"/> | <input type="radio"/>    | <input type="radio"/>                | <input type="radio"/>  | <input type="radio"/> | <input type="radio"/> |
| geef ik hem/haar het voordeel van de twijfel en vergeet de situatie.    | <input type="radio"/>     | <input type="radio"/> | <input type="radio"/>    | <input type="radio"/>                | <input type="radio"/>  | <input type="radio"/> | <input type="radio"/> |
| probeer ik de situatie op te lossen en de omstandigheden te verbeteren. | <input type="radio"/>     | <input type="radio"/> | <input type="radio"/>    | <input type="radio"/>                | <input type="radio"/>  | <input type="radio"/> | <input type="radio"/> |

**21. Geef bij elke stelling aan in hoeverre u het ermee eens of oneens bent.**

Kies het toepasselijke antwoord voor elk onderdeel:

|                                                                                         | helemaal<br>mee<br>oneens | mee oneens            | een beetje<br>mee oneens | niet mee<br>oneens/ niet<br>mee eens | een beetje<br>mee eens | mee eens              | helemaal mee<br>eens  |
|-----------------------------------------------------------------------------------------|---------------------------|-----------------------|--------------------------|--------------------------------------|------------------------|-----------------------|-----------------------|
| Ik waardeer mijn partner zoals hij/zij is, met zijn/haar positieve en negatieve kanten. | <input type="radio"/>     | <input type="radio"/> | <input type="radio"/>    | <input type="radio"/>                | <input type="radio"/>  | <input type="radio"/> | <input type="radio"/> |
| Mijn partner hoeft niet de perfecte partner te zijn.                                    | <input type="radio"/>     | <input type="radio"/> | <input type="radio"/>    | <input type="radio"/>                | <input type="radio"/>  | <input type="radio"/> | <input type="radio"/> |
| De dingen die ik niet leuk vind aan mijn partner probeer ik te veranderen.              | <input type="radio"/>     | <input type="radio"/> | <input type="radio"/>    | <input type="radio"/>                | <input type="radio"/>  | <input type="radio"/> | <input type="radio"/> |
| Ik kan de minder leuke eigenschappen van mijn partner accepteren.                       | <input type="radio"/>     | <input type="radio"/> | <input type="radio"/>    | <input type="radio"/>                | <input type="radio"/>  | <input type="radio"/> | <input type="radio"/> |
| Als ik eerlijk ben, wil ik graag dat mijn partner de ideale partner is.                 | <input type="radio"/>     | <input type="radio"/> | <input type="radio"/>    | <input type="radio"/>                | <input type="radio"/>  | <input type="radio"/> | <input type="radio"/> |



|                                                                                                      | helemaal<br>mee<br>oneens | mee oneens            | een beetje<br>mee oneens | niet mee<br>oneens/ niet<br>mee eens | een beetje<br>mee eens | mee eens              | helemaal mee<br>eens  |
|------------------------------------------------------------------------------------------------------|---------------------------|-----------------------|--------------------------|--------------------------------------|------------------------|-----------------------|-----------------------|
| Ik kan mij soms storen aan sommige eigenschappen van mijn partner maar dat vind ik op zich niet erg. | <input type="radio"/>     | <input type="radio"/> | <input type="radio"/>    | <input type="radio"/>                | <input type="radio"/>  | <input type="radio"/> | <input type="radio"/> |
| Ik vind het moeilijk om te accepteren dat mijn partner ook minder goede eigenschappen heeft.         | <input type="radio"/>     | <input type="radio"/> | <input type="radio"/>    | <input type="radio"/>                | <input type="radio"/>  | <input type="radio"/> | <input type="radio"/> |
| Er zitten ook minder leuke aspecten aan mijn relatie, maar dat vind ik prima.                        | <input type="radio"/>     | <input type="radio"/> | <input type="radio"/>    | <input type="radio"/>                | <input type="radio"/>  | <input type="radio"/> | <input type="radio"/> |
| Mijn relatie hoeft niet de perfecte relatie te zijn, waarin altijd alles goed gaat.                  | <input type="radio"/>     | <input type="radio"/> | <input type="radio"/>    | <input type="radio"/>                | <input type="radio"/>  | <input type="radio"/> | <input type="radio"/> |
| Als het even wat minder in mijn relatie gaat, vind ik                                                | <input type="radio"/>     | <input type="radio"/> | <input type="radio"/>    | <input type="radio"/>                | <input type="radio"/>  | <input type="radio"/> | <input type="radio"/> |

|                                                                                                                | helemaal<br>mee<br>oneens | mee oneens            | een beetje<br>mee oneens | niet mee<br>oneens/ niet<br>mee eens | een beetje<br>mee eens | mee eens              | helemaal mee<br>eens  |
|----------------------------------------------------------------------------------------------------------------|---------------------------|-----------------------|--------------------------|--------------------------------------|------------------------|-----------------------|-----------------------|
| dat moeilijk om te accepteren.                                                                                 |                           |                       |                          |                                      |                        |                       |                       |
| Ik waardeer mijn relatie met mijn partner, ondanks dat er ook minder positieve aspecten zitten aan de relatie. | <input type="radio"/>     | <input type="radio"/> | <input type="radio"/>    | <input type="radio"/>                | <input type="radio"/>  | <input type="radio"/> | <input type="radio"/> |
| Als het even wat minder gaat in onze relatie, wil ik dat zo snel mogelijk veranderen.                          | <input type="radio"/>     | <input type="radio"/> | <input type="radio"/>    | <input type="radio"/>                | <input type="radio"/>  | <input type="radio"/> | <input type="radio"/> |
| In een relatie komt het weleens voor dat je ontevreden bent en dat hoort er bij.                               | <input type="radio"/>     | <input type="radio"/> | <input type="radio"/>    | <input type="radio"/>                | <input type="radio"/>  | <input type="radio"/> | <input type="radio"/> |
| Moeilijke tijden horen bij elke relatie en dat is okay.                                                        | <input type="radio"/>     | <input type="radio"/> | <input type="radio"/>    | <input type="radio"/>                | <input type="radio"/>  | <input type="radio"/> | <input type="radio"/> |

**22. Geef bij elke stelling aan in hoeverre u het ermee eens of oneens bent.**

Kies het toepasselijke antwoord voor elk onderdeel:

|                                                                                                  | helemaal<br>mee<br>oneens | mee oneens            | een beetje<br>mee oneens | niet mee<br>oneens/ niet<br>mee eens | een beetje<br>mee eens | mee eens              | helemaal mee<br>eens  |
|--------------------------------------------------------------------------------------------------|---------------------------|-----------------------|--------------------------|--------------------------------------|------------------------|-----------------------|-----------------------|
| Ik ben over het algemeen tevreden met mijn relatie.                                              | <input type="radio"/>     | <input type="radio"/> | <input type="radio"/>    | <input type="radio"/>                | <input type="radio"/>  | <input type="radio"/> | <input type="radio"/> |
| Ik wil dat mijn relatie nog veel langer duurt.                                                   | <input type="radio"/>     | <input type="radio"/> | <input type="radio"/>    | <input type="radio"/>                | <input type="radio"/>  | <input type="radio"/> | <input type="radio"/> |
| Ik sta over het algemeen positief tegenover mijn relatie.                                        | <input type="radio"/>     | <input type="radio"/> | <input type="radio"/>    | <input type="radio"/>                | <input type="radio"/>  | <input type="radio"/> | <input type="radio"/> |
| Ik voel me emotioneel erg gehecht aan mijn partner.                                              | <input type="radio"/>     | <input type="radio"/> | <input type="radio"/>    | <input type="radio"/>                | <input type="radio"/>  | <input type="radio"/> | <input type="radio"/> |
| Ik voel me verbonden aan mijn relatie, ook als ik eens wat minder tevreden ben met mijn partner. | <input type="radio"/>     | <input type="radio"/> | <input type="radio"/>    | <input type="radio"/>                | <input type="radio"/>  | <input type="radio"/> | <input type="radio"/> |

|                                                                                                 | helemaal<br>mee<br>oneens | mee oneens            | een beetje<br>mee oneens | niet mee<br>oneens/ niet<br>mee eens | een beetje<br>mee eens | mee eens              | helemaal mee<br>eens  |
|-------------------------------------------------------------------------------------------------|---------------------------|-----------------------|--------------------------|--------------------------------------|------------------------|-----------------------|-----------------------|
| Mijn relatie lijkt op de ideale relatie.                                                        | <input type="radio"/>     | <input type="radio"/> | <input type="radio"/>    | <input type="radio"/>                | <input type="radio"/>  | <input type="radio"/> | <input type="radio"/> |
| Het zou best kunnen dat ik binnen een jaar een kortstondige relatie heb met een andere partner. | <input type="radio"/>     | <input type="radio"/> | <input type="radio"/>    | <input type="radio"/>                | <input type="radio"/>  | <input type="radio"/> | <input type="radio"/> |
| Mijn relatie is veel beter dan relaties van anderen.                                            | <input type="radio"/>     | <input type="radio"/> | <input type="radio"/>    | <input type="radio"/>                | <input type="radio"/>  | <input type="radio"/> | <input type="radio"/> |
| Ik wil mijn relatie graag in stand houden, ook als het eens wat slechter gaat.                  | <input type="radio"/>     | <input type="radio"/> | <input type="radio"/>    | <input type="radio"/>                | <input type="radio"/>  | <input type="radio"/> | <input type="radio"/> |
| Mijn relatie geeft me voldoening en maakt me gelukkig.                                          | <input type="radio"/>     | <input type="radio"/> | <input type="radio"/>    | <input type="radio"/>                | <input type="radio"/>  | <input type="radio"/> | <input type="radio"/> |
| Het zou best kunnen dat mijn relatie eindigt in de nabije toekomst.                             | <input type="radio"/>     | <input type="radio"/> | <input type="radio"/>    | <input type="radio"/>                | <input type="radio"/>  | <input type="radio"/> | <input type="radio"/> |
| Ik ben over het algemeen tevreden                                                               | <input type="radio"/>     | <input type="radio"/> | <input type="radio"/>    | <input type="radio"/>                | <input type="radio"/>  | <input type="radio"/> | <input type="radio"/> |

|                                                                                   | helemaal<br>mee<br>oneens | mee oneens            | een beetje<br>mee oneens | niet mee<br>oneens/<br>niet<br>mee eens | een beetje<br>mee eens | mee eens              | helemaal mee<br>eens  |
|-----------------------------------------------------------------------------------|---------------------------|-----------------------|--------------------------|-----------------------------------------|------------------------|-----------------------|-----------------------|
| met mijn<br>seksleven.                                                            |                           |                       |                          |                                         |                        |                       |                       |
| Ik ben tevreden<br>over hoe vaak mijn<br>partner en ik seks<br>hebben.            | <input type="radio"/>     | <input type="radio"/> | <input type="radio"/>    | <input type="radio"/>                   | <input type="radio"/>  | <input type="radio"/> | <input type="radio"/> |
| Ik ben tevreden<br>over hoe<br>hartstochtelijk en<br>sensueel onze<br>relatie is. | <input type="radio"/>     | <input type="radio"/> | <input type="radio"/>    | <input type="radio"/>                   | <input type="radio"/>  | <input type="radio"/> | <input type="radio"/> |

**23. In hoeverre is de volgende stelling op u van toepassing?**

Kies het toepasselijke antwoord voor elk onderdeel:

|                                    | helemaal<br>niet van<br>toepassing | niet van<br>toepassing | nauwelijks<br>van<br>toepassing | enigszins<br>van<br>toepassing | redelijk van<br>toepassing | behoorlijk<br>van<br>toepassing | heel erg van<br>toepassing |
|------------------------------------|------------------------------------|------------------------|---------------------------------|--------------------------------|----------------------------|---------------------------------|----------------------------|
| Ik heb een hoge<br>zelfwaardering. | <input type="radio"/>              | <input type="radio"/>  | <input type="radio"/>           | <input type="radio"/>          | <input type="radio"/>      | <input type="radio"/>           | <input type="radio"/>      |

**24. Hoe vaak hebben u en uw partner meningsverschillen, onenigheid, of ruzie over...**

Kies het toepasselijke antwoord voor elk onderdeel:

|                                                                                | nooit                 | zeer zelden           | zelden                | af en toe             | regelmatig            | vaak                  | heel vaak             |
|--------------------------------------------------------------------------------|-----------------------|-----------------------|-----------------------|-----------------------|-----------------------|-----------------------|-----------------------|
| Geld                                                                           | <input type="radio"/> |
| Contact met<br>(schoon)familie                                                 | <input type="radio"/> |
| Lichamelijke intimiteit<br>(seks, lichamelijk contact)                         | <input type="radio"/> |
| Emotionele intimiteit (uiten<br>van gevoelens, bespreken<br>van problemen)     | <input type="radio"/> |
| De verdeling van taken in<br>en om huis                                        | <input type="radio"/> |
| De opvoeding van de<br>kinderen (indien niet van<br>toepassing, vul in: nooit) | <input type="radio"/> |
| De besteding van vrije tijd                                                    | <input type="radio"/> |
| Doelen in het leven of<br>geloofsovertuiging                                   | <input type="radio"/> |
| Werk                                                                           | <input type="radio"/> |

**25. Geef voor elk van de onderstaande stellingen aan in hoeverre de stelling van toepassing is op uw gedrag ten opzichte van uw partner.**

Kies het toepasselijke antwoord voor elk onderdeel:

|                                                                                       | helemaal<br>mee<br>oneens | mee oneens            | een beetje<br>mee oneens | niet mee<br>oneens/niet<br>mee eens | een beetje<br>mee eens | mee eens              | helemaal mee<br>eens  |
|---------------------------------------------------------------------------------------|---------------------------|-----------------------|--------------------------|-------------------------------------|------------------------|-----------------------|-----------------------|
| Ik ben er over het algemeen snel overheen wanneer mijn partner mijn gevoelens kwetst. | <input type="radio"/>     | <input type="radio"/> | <input type="radio"/>    | <input type="radio"/>               | <input type="radio"/>  | <input type="radio"/> | <input type="radio"/> |
| Als mijn partner mij kwetst denk ik er vaak nog lange tijd over na.                   | <input type="radio"/>     | <input type="radio"/> | <input type="radio"/>    | <input type="radio"/>               | <input type="radio"/>  | <input type="radio"/> | <input type="radio"/> |
| Wanneer mijn partner mij kwetst, is mijn aanpak om het te vergeven en vergeten.       | <input type="radio"/>     | <input type="radio"/> | <input type="radio"/>    | <input type="radio"/>               | <input type="radio"/>  | <input type="radio"/> | <input type="radio"/> |
| Ik heb de neiging om wraakgevoelens te hebben naar mijn partner.                      | <input type="radio"/>     | <input type="radio"/> | <input type="radio"/>    | <input type="radio"/>               | <input type="radio"/>  | <input type="radio"/> | <input type="radio"/> |

**26. Hoe tevreden bent u over het algemeen met uw relatie? Geef uw relatie een rapportcijfer tussen de 1 en de 10.**

Kies het toepasselijke antwoord voor elk onderdeel:

|        |                       |                       |                       |                       |                       |                       |                       |                       |                       |                       |
|--------|-----------------------|-----------------------|-----------------------|-----------------------|-----------------------|-----------------------|-----------------------|-----------------------|-----------------------|-----------------------|
|        | 1                     | 2                     | 3                     | 4                     | 5                     | 6                     | 7                     | 8                     | 9                     | 10                    |
| Cijfer | <input type="radio"/> |

**Hartelijk dank voor uw deelname aan deze vragenlijst!**

**Met uw deelname maakt u kans op een waardebon van bol.com ter besteding van €25,-**

**Heeft u hier interesse in? Vul onderin dan uw e-mailadres in en klik op 'versturen'.**

**Deze gegevens worden uiteraard niet gekoppeld aan de data en zullen niet voor andere doeleinden worden gebruikt. Indien u geen e-mailadres wilt invullen, klik dan direct op 'versturen'.**

Vul uw antwoord hier in:

**Verstuur uw enquête**

**Bedankt voor uw deelname aan deze enquête.**



## **Questionnaire Study 2 (the original was programmed in LimeSurvey, in Dutch)**

### **Onderzoek naar partnerrelaties**

Deze online vragenlijst maakt deel uit van een onderzoeksprogramma naar partnerrelaties van de Universiteit Utrecht en de Radboud Universiteit. Het invullen van deze vragenlijst zal ongeveer een kwartier tot twintig minuten in beslag nemen. We willen met deze vragenlijst graag meer te weten komen over hoe u de relatie met uw partner ervaart. U behoort tot de doelgroep als u minimaal 18 jaar bent, een partnerrelatie heeft van minimaal 1 jaar en wanneer u het afgelopen jaar geen soortgelijke vragenlijst heeft ingevuld. Let op, er mag maar één iemand per koppel de vragenlijst invullen. Vul de vragenlijst niet in met uw mobiele telefoon in verband met het kunnen dragen van het programma.

Het is belangrijk dat u de vragen goed doorleest en eerlijk invult. Denk niet te lang over een vraag na, maar vul in wat het eerste in u opkomt. Bij het beantwoorden van de vragen gaat het erom wat u vindt, dus er is geen goed of fout antwoord.

Uiteraard zal bij het invullen van deze vragenlijst uw anonimiteit gewaarborgd worden; er wordt niet naar uw naam of andere identificerende informatie gevraagd. De gegevens die in dit onderzoek verzameld worden, zullen vertrouwelijk behandeld worden. Deelname aan dit onderzoek is vrijwillig; u kunt uw deelname op elk gewenst moment stoppen. Onder de deelnemers worden 10 bol.com cadeaubonnen ter waarde van 10 euro verloot! De bonnen worden verloot onder deelnemers die de vragenlijst volledig en serieus invullen. Indien u hier kans op wilt maken, kunt u aan het einde van de vragenlijst uw e-mailadres invullen. Dit e-mailadres wordt alleen gebruikt voor het verzenden van de cadeaubon indien u deze gewonnen heeft en indien u interesse in de resultaten van het onderzoek heeft.

Bij voorbaat hartelijk dank voor uw deelname.

### **Toestemmingsverklaring**

**Ik geef toestemming voor het (anonieme) gebruik van mijn gegevens voor wetenschappelijk onderzoek en ga naar de vragenlijst.**

Kies één van de volgende mogelijkheden:

- Ja, ik geef toestemming en ga naar de vragenlijst
-

### Algemene vragen

1. **Wat is uw geslacht?** Kies één van de volgende mogelijkheden:

- Man
- Vrouw

2. **Wat is uw leeftijd in jaren?**

Vul uw antwoord hier in:

•

3. **Wat is het geslacht van uw partner?** Kies één van de volgende mogelijkheden:

- Man
- Vrouw

4. **Hoe veel jaren heeft u deze relatie?** Dit graag invullen in hele of halve jaren.

Vul uw antwoord hier in:

5. **Wat is uw burgerlijke staat?** Kies één van de volgende mogelijkheden:

- Gehuwd en samenwonend
- Ongehuwd en samenwonend
- Gehuwd en niet samenwonend
- Ongehuwd en niet samenwonend

6. **Hoeveel kinderen heeft u?** Kies één van de volgende mogelijkheden:

- 0
- 1
- 2
- 3
- 4
- 5
- 6

7. **Wat is uw hoogste genoten opleiding?** Kies één van de volgende mogelijkheden:

- Basisschool
- Lager beroepsonderwijs (LBO)
- M.U.L.O/M.A.V.O/V.M.B.O
- Middelbaar beroepsonderwijs (MBO)
- H.B.S./H.A.V.O./V.W.O.
- Hoger beroepsonderwijs (HBO)
- Wetenschappelijk onderwijs (WO)

8. **Heeft u betaald werk?** Kies één van de volgende mogelijkheden:

- Ja
- Nee

9. **Studeert u?** Kies één van de volgende mogelijkheden:

- Ja
- Nee

**10. Hoeveel uur per week besteedt u aan betaald werk (indien van toepassing: volgens uw arbeidscontract)?**

In dit veld mogen alleen cijfers ingevoerd worden.

Vul uw antwoord hier in:

**11. Wat is naar schatting uw huidige, individuele netto (besteedbaar) inkomen per jaar? Kies één van de volgende mogelijkheden:**

- Minder dan 10.000 euro
- 10.000 tot 20.000 euro
- 20.000 tot 30.000 euro
- 30.000 tot 40.000 euro
- 40.000 tot 50.000 euro
- 50.000 euro of meer

**12. Wat is uw geloofsovertuiging? Indien u 'Andere:' kiest, licht deze keuze dan toe in het bijbehorende tekstvak. Kies één van de volgende mogelijkheden:**

- Geen
- Rooms-katholiek
- Protestants
- Islamitisch
- Joods
- Hindoeïstisch
- Boeddhistisch
- Andere

**13. De volgende stellingen gaan over hoe u zich doorgaans voelt binnen de relatie met uw partner. Geef bij elke stelling aan in hoeverre u het ermee eens of oneens bent.**

**In mijn relatie...**

Kies het toepasselijke antwoord voor elk onderdeel:

|                                                                                 | helemaal<br>mee<br>oneens | mee oneens            | een beetje<br>mee oneens | niet mee<br>oneens/<br>niet<br>mee eens | een beetje<br>mee eens | mee eens              | helemaal mee<br>eens  |
|---------------------------------------------------------------------------------|---------------------------|-----------------------|--------------------------|-----------------------------------------|------------------------|-----------------------|-----------------------|
| Voel ik me vrij om te zijn wie ik ben.                                          | <input type="radio"/>     | <input type="radio"/> | <input type="radio"/>    | <input type="radio"/>                   | <input type="radio"/>  | <input type="radio"/> | <input type="radio"/> |
| Heb ik een stem in wat er in mijn relatie gebeurt.                              | <input type="radio"/>     | <input type="radio"/> | <input type="radio"/>    | <input type="radio"/>                   | <input type="radio"/>  | <input type="radio"/> | <input type="radio"/> |
| Voel ik me geliefd.                                                             | <input type="radio"/>     | <input type="radio"/> | <input type="radio"/>    | <input type="radio"/>                   | <input type="radio"/>  | <input type="radio"/> | <input type="radio"/> |
| Voel ik dat mijn partner om mij geeft.                                          | <input type="radio"/>     | <input type="radio"/> | <input type="radio"/>    | <input type="radio"/>                   | <input type="radio"/>  | <input type="radio"/> | <input type="radio"/> |
| Voel ik me gecontroleerd en onder druk gezet om op een bepaalde manier te zijn. | <input type="radio"/>     | <input type="radio"/> | <input type="radio"/>    | <input type="radio"/>                   | <input type="radio"/>  | <input type="radio"/> | <input type="radio"/> |
| Voel ik veel afstand naar mijn partner.                                         | <input type="radio"/>     | <input type="radio"/> | <input type="radio"/>    | <input type="radio"/>                   | <input type="radio"/>  | <input type="radio"/> | <input type="radio"/> |

|                                                                             | helemaal<br>mee<br>oneens | mee oneens            | een beetje<br>mee oneens | niet mee<br>oneens/<br>niet<br>mee eens | een beetje<br>mee eens | mee eens              | helemaal mee<br>eens  |
|-----------------------------------------------------------------------------|---------------------------|-----------------------|--------------------------|-----------------------------------------|------------------------|-----------------------|-----------------------|
| Voel ik me vrij om mijn eigen beslissingen te nemen.                        | <input type="radio"/>     | <input type="radio"/> | <input type="radio"/>    | <input type="radio"/>                   | <input type="radio"/>  | <input type="radio"/> | <input type="radio"/> |
| Voel ik me verbonden met mijn partner.                                      | <input type="radio"/>     | <input type="radio"/> | <input type="radio"/>    | <input type="radio"/>                   | <input type="radio"/>  | <input type="radio"/> | <input type="radio"/> |
| Kan ik mijzelf zijn in dagelijkse situaties.                                | <input type="radio"/>     | <input type="radio"/> | <input type="radio"/>    | <input type="radio"/>                   | <input type="radio"/>  | <input type="radio"/> | <input type="radio"/> |
| Voel ik me vrij om mijn gevoelens, ideeën en mening te uiten.               | <input type="radio"/>     | <input type="radio"/> | <input type="radio"/>    | <input type="radio"/>                   | <input type="radio"/>  | <input type="radio"/> | <input type="radio"/> |
| Voelt het alsof ik me anders moet voordoen dan wie ik daadwerkelijk ben.    | <input type="radio"/>     | <input type="radio"/> | <input type="radio"/>    | <input type="radio"/>                   | <input type="radio"/>  | <input type="radio"/> | <input type="radio"/> |
| Voel ik me vrij om dingen voor mezelf te doen als ik daar behoefte aan heb. | <input type="radio"/>     | <input type="radio"/> | <input type="radio"/>    | <input type="radio"/>                   | <input type="radio"/>  | <input type="radio"/> | <input type="radio"/> |
| Voel ik me close met mijn partner.                                          | <input type="radio"/>     | <input type="radio"/> | <input type="radio"/>    | <input type="radio"/>                   | <input type="radio"/>  | <input type="radio"/> | <input type="radio"/> |

|                                                                                                     | helemaal<br>mee<br>oneens | mee oneens            | een beetje<br>mee oneens | niet mee<br>oneens/<br>niet<br>mee eens | een beetje<br>mee eens | mee eens              | helemaal mee<br>eens  |
|-----------------------------------------------------------------------------------------------------|---------------------------|-----------------------|--------------------------|-----------------------------------------|------------------------|-----------------------|-----------------------|
| Voelt het alsof mijn partner verwacht dat ik alles doe zoals hij/zij het wil.                       | <input type="radio"/>     | <input type="radio"/> | <input type="radio"/>    | <input type="radio"/>                   | <input type="radio"/>  | <input type="radio"/> | <input type="radio"/> |
| Voelt het alsof mijn partner altijd het laatste woord heeft over hoe wij dingen doen in de relatie. | <input type="radio"/>     | <input type="radio"/> | <input type="radio"/>    | <input type="radio"/>                   | <input type="radio"/>  | <input type="radio"/> | <input type="radio"/> |
| Voelt het alsof mijn partner mij echt begrijpt.                                                     | <input type="radio"/>     | <input type="radio"/> | <input type="radio"/>    | <input type="radio"/>                   | <input type="radio"/>  | <input type="radio"/> | <input type="radio"/> |
| Voel ik me vrij om te bepalen wat ik doe en hoe ik het doe.                                         | <input type="radio"/>     | <input type="radio"/> | <input type="radio"/>    | <input type="radio"/>                   | <input type="radio"/>  | <input type="radio"/> | <input type="radio"/> |
| Voel ik veel hechtheid en intimiteit met mijn partner.                                              | <input type="radio"/>     | <input type="radio"/> | <input type="radio"/>    | <input type="radio"/>                   | <input type="radio"/>  | <input type="radio"/> | <input type="radio"/> |

**14. De volgende vragen gaan over uzelf en over hoe u in de relatie staat. Geef bij elke stelling aan in hoeverre u het ermee eens of oneens bent.**

Kies het toepasselijke antwoord voor elk onderdeel:

|                                                                                             | helemaal<br>mee<br>oneens | mee oneens            | een beetje<br>mee oneens | niet mee<br>oneens/ niet<br>mee eens | een beetje<br>mee eens | mee eens              | helemaal mee<br>eens  |
|---------------------------------------------------------------------------------------------|---------------------------|-----------------------|--------------------------|--------------------------------------|------------------------|-----------------------|-----------------------|
| Soms voelt mijn relatie als een emotionele achtbaan.                                        | <input type="radio"/>     | <input type="radio"/> | <input type="radio"/>    | <input type="radio"/>                | <input type="radio"/>  | <input type="radio"/> | <input type="radio"/> |
| Ik heb moeite met het uiten van mijn diepste gevoelens en wensen aan mijn partner.          | <input type="radio"/>     | <input type="radio"/> | <input type="radio"/>    | <input type="radio"/>                | <input type="radio"/>  | <input type="radio"/> | <input type="radio"/> |
| Ik ga niet snel naar mijn partner voor emotionele steun.                                    | <input type="radio"/>     | <input type="radio"/> | <input type="radio"/>    | <input type="radio"/>                | <input type="radio"/>  | <input type="radio"/> | <input type="radio"/> |
| Ik blijf meestal (behoorlijk) rustig wanneer mijn partner of de relatie onder stress staat. | <input type="radio"/>     | <input type="radio"/> | <input type="radio"/>    | <input type="radio"/>                | <input type="radio"/>  | <input type="radio"/> | <input type="radio"/> |
| Ik heb meestal veel aanmoediging nodig van mijn partner wanneer ik aan iets nieuws begin.   | <input type="radio"/>     | <input type="radio"/> | <input type="radio"/>    | <input type="radio"/>                | <input type="radio"/>  | <input type="radio"/> | <input type="radio"/> |
| Wanneer mijn partner mij teleurstelt, trek ik mij een tijdje van hem/haar terug.            | <input type="radio"/>     | <input type="radio"/> | <input type="radio"/>    | <input type="radio"/>                | <input type="radio"/>  | <input type="radio"/> | <input type="radio"/> |
| Wat er ook gebeurt in mijn relatie, ik weet dat ik nooit                                    | <input type="radio"/>     | <input type="radio"/> | <input type="radio"/>    | <input type="radio"/>                | <input type="radio"/>  | <input type="radio"/> | <input type="radio"/> |



|                                                                                     | helemaal<br>mee<br>oneens | mee oneens            | een beetje<br>mee oneens | niet mee<br>oneens/ niet<br>mee eens | een beetje<br>mee eens | mee eens              | helemaal mee<br>eens  |
|-------------------------------------------------------------------------------------|---------------------------|-----------------------|--------------------------|--------------------------------------|------------------------|-----------------------|-----------------------|
| het gevoel verlies van wie ik ben.                                                  |                           |                       |                          |                                      |                        |                       |                       |
| Wanneer mijn relatie te hecht wordt, heb ik de neiging om afstand te nemen.         | <input type="radio"/>     | <input type="radio"/> | <input type="radio"/>    | <input type="radio"/>                | <input type="radio"/>  | <input type="radio"/> | <input type="radio"/> |
| Ik probeer de verwachtingen die mijn partner van mij heeft waar te maken.           | <input type="radio"/>     | <input type="radio"/> | <input type="radio"/>    | <input type="radio"/>                | <input type="radio"/>  | <input type="radio"/> | <input type="radio"/> |
| Soms krijgen mijn gevoelens de overhand en heb ik moeite om helder na te denken.    | <input type="radio"/>     | <input type="radio"/> | <input type="radio"/>    | <input type="radio"/>                | <input type="radio"/>  | <input type="radio"/> | <input type="radio"/> |
| Ik verander mijn gedrag meestal niet simpelweg om mijn partner tevreden te stellen. | <input type="radio"/>     | <input type="radio"/> | <input type="radio"/>    | <input type="radio"/>                | <input type="radio"/>  | <input type="radio"/> | <input type="radio"/> |
| Ik voel me vaak ongemakkelijk wanneer mijn partner te dichtbij komt.                | <input type="radio"/>     | <input type="radio"/> | <input type="radio"/>    | <input type="radio"/>                | <input type="radio"/>  | <input type="radio"/> | <input type="radio"/> |
| Wanneer mijn partner mij bekritiseert, trek ik mij dat persoonlijk aan.             | <input type="radio"/>     | <input type="radio"/> | <input type="radio"/>    | <input type="radio"/>                | <input type="radio"/>  | <input type="radio"/> | <input type="radio"/> |

|                                                                                                                                          | helemaal<br>mee<br>oneens | mee oneens            | een beetje<br>mee oneens | niet mee<br>oneens/ niet<br>mee eens | een beetje<br>mee eens | mee eens              | helemaal mee<br>eens  |
|------------------------------------------------------------------------------------------------------------------------------------------|---------------------------|-----------------------|--------------------------|--------------------------------------|------------------------|-----------------------|-----------------------|
| Ik ben overgevoelig voor kritiek van mijn partner.                                                                                       | <input type="radio"/>     | <input type="radio"/> | <input type="radio"/>    | <input type="radio"/>                | <input type="radio"/>  | <input type="radio"/> | <input type="radio"/> |
| Als ik een woordenwisseling heb met mijn partner, kan ik mijn gedachten over het probleem scheiden van mijn gevoelens voor mijn partner. | <input type="radio"/>     | <input type="radio"/> | <input type="radio"/>    | <input type="radio"/>                | <input type="radio"/>  | <input type="radio"/> | <input type="radio"/> |
| Wanneer mijn relatie erg intens wordt, voel ik de neiging om ervoor weg te rennen.                                                       | <input type="radio"/>     | <input type="radio"/> | <input type="radio"/>    | <input type="radio"/>                | <input type="radio"/>  | <input type="radio"/> | <input type="radio"/> |
| Ik heb veel behoefte aan goedkeuring van mijn partner.                                                                                   | <input type="radio"/>     | <input type="radio"/> | <input type="radio"/>    | <input type="radio"/>                | <input type="radio"/>  | <input type="radio"/> | <input type="radio"/> |
| Ik vraag me vaak af wat voor indruk ik maak op mijn partner.                                                                             | <input type="radio"/>     | <input type="radio"/> | <input type="radio"/>    | <input type="radio"/>                | <input type="radio"/>  | <input type="radio"/> | <input type="radio"/> |
| Het heeft geen zin om mij druk te maken over dingen die ik niet kan veranderen.                                                          | <input type="radio"/>     | <input type="radio"/> | <input type="radio"/>    | <input type="radio"/>                | <input type="radio"/>  | <input type="radio"/> | <input type="radio"/> |
| Ik ben vaak bezorgd over het verliezen van mijn onafhankelijkheid in mijn relatie.                                                       | <input type="radio"/>     | <input type="radio"/> | <input type="radio"/>    | <input type="radio"/>                | <input type="radio"/>  | <input type="radio"/> | <input type="radio"/> |

|                                                                                                                     | helemaal<br>mee<br>oneens | mee oneens            | een beetje<br>mee oneens | niet mee<br>oneens/ niet<br>mee eens | een beetje<br>mee eens | mee eens              | helemaal mee<br>eens  |
|---------------------------------------------------------------------------------------------------------------------|---------------------------|-----------------------|--------------------------|--------------------------------------|------------------------|-----------------------|-----------------------|
| Ik ben er erg gevoelig voor om gekwetst te worden door mijn partner.                                                | <input type="radio"/>     | <input type="radio"/> | <input type="radio"/>    | <input type="radio"/>                | <input type="radio"/>  | <input type="radio"/> | <input type="radio"/> |
| Ik vind het belangrijk om de mening van mijn partner te horen voordat ik een beslissing maak.                       | <input type="radio"/>     | <input type="radio"/> | <input type="radio"/>    | <input type="radio"/>                | <input type="radio"/>  | <input type="radio"/> | <input type="radio"/> |
| Het voelt voor mij vaak alsof mijn partner teveel van mij wil.                                                      | <input type="radio"/>     | <input type="radio"/> | <input type="radio"/>    | <input type="radio"/>                | <input type="radio"/>  | <input type="radio"/> | <input type="radio"/> |
| Ik ben het vaak eens met mijn partner, simpelweg om hem/haar tevreden te stellen.                                   | <input type="radio"/>     | <input type="radio"/> | <input type="radio"/>    | <input type="radio"/>                | <input type="radio"/>  | <input type="radio"/> | <input type="radio"/> |
| Als ik een woordenwisseling heb gehad met mijn partner, kan ik er de hele dag over piekeren.                        | <input type="radio"/>     | <input type="radio"/> | <input type="radio"/>    | <input type="radio"/>                | <input type="radio"/>  | <input type="radio"/> | <input type="radio"/> |
| Ik ben goed in staat om nee te zeggen tegen mijn partner, zelfs wanneer ik mij onder druk gezet voel door hem/haar. | <input type="radio"/>     | <input type="radio"/> | <input type="radio"/>    | <input type="radio"/>                | <input type="radio"/>  | <input type="radio"/> | <input type="radio"/> |
| Als ik met mijn partner ben, voel ik me vaak verstikt.                                                              | <input type="radio"/>     | <input type="radio"/> | <input type="radio"/>    | <input type="radio"/>                | <input type="radio"/>  | <input type="radio"/> | <input type="radio"/> |

|                                                                                                                     | helemaal<br>mee<br>oneens | mee oneens            | een beetje<br>mee oneens | niet mee<br>oneens/ niet<br>mee eens | een beetje<br>mee eens | mee eens              | helemaal mee<br>eens  |
|---------------------------------------------------------------------------------------------------------------------|---------------------------|-----------------------|--------------------------|--------------------------------------|------------------------|-----------------------|-----------------------|
| Ik voel me vaak onzeker<br>wanneer mijn partner niet in<br>de buurt is om mij te helpen<br>een beslissing te nemen. | <input type="radio"/>     | <input type="radio"/> | <input type="radio"/>    | <input type="radio"/>                | <input type="radio"/>  | <input type="radio"/> | <input type="radio"/> |
| Als mijn partner boos op<br>mij is, kan ik het heel<br>moeilijk loslaten.                                           | <input type="radio"/>     | <input type="radio"/> | <input type="radio"/>    | <input type="radio"/>                | <input type="radio"/>  | <input type="radio"/> | <input type="radio"/> |
| Ik vind het belangrijker dat<br>ik doe wat ik denk dat goed<br>is dan dat mijn partner mij<br>goedkeurt.            | <input type="radio"/>     | <input type="radio"/> | <input type="radio"/>    | <input type="radio"/>                | <input type="radio"/>  | <input type="radio"/> | <input type="radio"/> |
| Als dingen fout gaan in<br>mijn relatie, maakt erover<br>praten het meestal alleen<br>maar erger.                   | <input type="radio"/>     | <input type="radio"/> | <input type="radio"/>    | <input type="radio"/>                | <input type="radio"/>  | <input type="radio"/> | <input type="radio"/> |
| Ik maak me vaak zorgen<br>over dat mijn partner ziek,<br>gekwetst of van streek<br>raakt.                           | <input type="radio"/>     | <input type="radio"/> | <input type="radio"/>    | <input type="radio"/>                | <input type="radio"/>  | <input type="radio"/> | <input type="radio"/> |

**15. Lees elk van de volgende stellingen die betrekking hebben op de manier waarop u reageert op negatief gedrag van uw partner en geef aan in hoeverre u het ermee eens bent.**

**Wanneer mijn partner mij kwetst of beledigt,...**

Kies het toepasselijke antwoord voor elk onderdeel:

|                                                                                      | Helemaal<br>mee<br>oneens | Mee oneens            | Een beetje<br>mee oneens | Niet mee<br>oneens, niet<br>mee eens | Een beetje<br>mee eens | Mee eens              | Helemaal mee<br>eens  |
|--------------------------------------------------------------------------------------|---------------------------|-----------------------|--------------------------|--------------------------------------|------------------------|-----------------------|-----------------------|
| dreig ik om hem/haar te<br>verlaten.                                                 | <input type="radio"/>     | <input type="radio"/> | <input type="radio"/>    | <input type="radio"/>                | <input type="radio"/>  | <input type="radio"/> | <input type="radio"/> |
| ga ik zitten mokken en neger<br>het probleem.                                        | <input type="radio"/>     | <input type="radio"/> | <input type="radio"/>    | <input type="radio"/>                | <input type="radio"/>  | <input type="radio"/> | <input type="radio"/> |
| wacht ik af tot zijn/haar<br>stemming verandert – die gaat<br>vanzelf over.          | <input type="radio"/>     | <input type="radio"/> | <input type="radio"/>    | <input type="radio"/>                | <input type="radio"/>  | <input type="radio"/> | <input type="radio"/> |
| bespreek ik met mijn partner<br>wat er aan de hand is om een<br>oplossing te vinden. | <input type="radio"/>     | <input type="radio"/> | <input type="radio"/>    | <input type="radio"/>                | <input type="radio"/>  | <input type="radio"/> | <input type="radio"/> |

**16. Wanneer mijn partner zich onaangenaam gedraagt tegenover mij,...**

Kies het toepasselijke antwoord voor elk onderdeel:

|                                                             | Helemaal<br>mee<br>oneens | Mee oneens            | Een beetje<br>mee oneens | Niet mee<br>oneens, niet<br>mee eens | Een beetje<br>mee eens | Mee eens              | Helemaal mee<br>eens  |
|-------------------------------------------------------------|---------------------------|-----------------------|--------------------------|--------------------------------------|------------------------|-----------------------|-----------------------|
| vergeef ik mijn partner en vergeet ik wat er is gebeurd.    | <input type="radio"/>     | <input type="radio"/> | <input type="radio"/>    | <input type="radio"/>                | <input type="radio"/>  | <input type="radio"/> | <input type="radio"/> |
| bespreek ik de situatie op een rustige manier met hem/haar. | <input type="radio"/>     | <input type="radio"/> | <input type="radio"/>    | <input type="radio"/>                | <input type="radio"/>  | <input type="radio"/> | <input type="radio"/> |
| reageer ik op een even onaangename manier.                  | <input type="radio"/>     | <input type="radio"/> | <input type="radio"/>    | <input type="radio"/>                | <input type="radio"/>  | <input type="radio"/> | <input type="radio"/> |
| breng ik minder tijd met hem/haar door.                     | <input type="radio"/>     | <input type="radio"/> | <input type="radio"/>    | <input type="radio"/>                | <input type="radio"/>  | <input type="radio"/> | <input type="radio"/> |

**17. Wanneer mijn partner onattent is of geen rekening houdt met mij,...**

Kies het toepasselijke antwoord voor elk onderdeel:

|                                                                                | Helemaal<br>mee<br>oneens | Mee oneens            | Een beetje<br>mee oneens | Niet mee<br>oneens, niet<br>mee eens | Een beetje<br>mee eens | Mee eens              | Helemaal mee<br>eens  |
|--------------------------------------------------------------------------------|---------------------------|-----------------------|--------------------------|--------------------------------------|------------------------|-----------------------|-----------------------|
| vermijd ik de<br>situatie.                                                     | <input type="radio"/>     | <input type="radio"/> | <input type="radio"/>    | <input type="radio"/>                | <input type="radio"/>  | <input type="radio"/> | <input type="radio"/> |
| wacht ik met<br>geduld af tot de<br>situatie<br>verbetert.                     | <input type="radio"/>     | <input type="radio"/> | <input type="radio"/>    | <input type="radio"/>                | <input type="radio"/>  | <input type="radio"/> | <input type="radio"/> |
| probeer ik de<br>situatie te<br>herstellen en<br>het probleem op<br>te lossen. | <input type="radio"/>     | <input type="radio"/> | <input type="radio"/>    | <input type="radio"/>                | <input type="radio"/>  | <input type="radio"/> | <input type="radio"/> |
| doe ik dingen<br>om mijn partner<br>op afstand te<br>houden.                   | <input type="radio"/>     | <input type="radio"/> | <input type="radio"/>    | <input type="radio"/>                | <input type="radio"/>  | <input type="radio"/> | <input type="radio"/> |

**18. Wanneer mijn partner grof of bot doet tegen mij,...**

Kies het toepasselijke antwoord voor elk onderdeel:

|                                                                         | Helemaal<br>mee<br>oneens | Mee oneens            | Een beetje<br>mee oneens | Niet mee<br>oneens, niet<br>mee eens | Een beetje<br>mee eens | Mee eens              | Helemaal mee<br>eens  |
|-------------------------------------------------------------------------|---------------------------|-----------------------|--------------------------|--------------------------------------|------------------------|-----------------------|-----------------------|
| voel ik mij zo boos dat ik rechtstreeks de deur uit wil lopen.          | <input type="radio"/>     | <input type="radio"/> | <input type="radio"/>    | <input type="radio"/>                | <input type="radio"/>  | <input type="radio"/> | <input type="radio"/> |
| negeer ik de gehele situatie.                                           | <input type="radio"/>     | <input type="radio"/> | <input type="radio"/>    | <input type="radio"/>                | <input type="radio"/>  | <input type="radio"/> | <input type="radio"/> |
| geef ik hem/haar het voordeel van de twijfel en vergeet de situatie.    | <input type="radio"/>     | <input type="radio"/> | <input type="radio"/>    | <input type="radio"/>                | <input type="radio"/>  | <input type="radio"/> | <input type="radio"/> |
| probeer ik de situatie op te lossen en de omstandigheden te verbeteren. | <input type="radio"/>     | <input type="radio"/> | <input type="radio"/>    | <input type="radio"/>                | <input type="radio"/>  | <input type="radio"/> | <input type="radio"/> |

**19. Geef bij elke stelling aan in hoeverre u het ermee eens of oneens bent.**

Kies het toepasselijke antwoord voor elk onderdeel:

|                                                                                         | helemaal<br>mee<br>oneens | mee oneens            | een beetje<br>mee oneens | niet mee<br>oneens/ niet<br>mee eens | een beetje<br>mee eens | mee eens              | helemaal mee<br>eens  |
|-----------------------------------------------------------------------------------------|---------------------------|-----------------------|--------------------------|--------------------------------------|------------------------|-----------------------|-----------------------|
| Ik waardeer mijn partner zoals hij/zij is, met zijn/haar positieve en negatieve kanten. | <input type="radio"/>     | <input type="radio"/> | <input type="radio"/>    | <input type="radio"/>                | <input type="radio"/>  | <input type="radio"/> | <input type="radio"/> |



|                                                                                                      | helemaal<br>mee<br>oneens | mee oneens            | een beetje<br>mee oneens | niet mee<br>oneens/ niet<br>mee eens | een beetje<br>mee eens | mee eens              | helemaal mee<br>eens  |
|------------------------------------------------------------------------------------------------------|---------------------------|-----------------------|--------------------------|--------------------------------------|------------------------|-----------------------|-----------------------|
| Mijn partner hoeft niet de perfecte partner te zijn.                                                 | <input type="radio"/>     | <input type="radio"/> | <input type="radio"/>    | <input type="radio"/>                | <input type="radio"/>  | <input type="radio"/> | <input type="radio"/> |
| De dingen die ik niet leuk vind aan mijn partner probeer ik te veranderen.                           | <input type="radio"/>     | <input type="radio"/> | <input type="radio"/>    | <input type="radio"/>                | <input type="radio"/>  | <input type="radio"/> | <input type="radio"/> |
| Ik kan de minder leuke eigenschappen van mijn partner accepteren.                                    | <input type="radio"/>     | <input type="radio"/> | <input type="radio"/>    | <input type="radio"/>                | <input type="radio"/>  | <input type="radio"/> | <input type="radio"/> |
| Als ik eerlijk ben, wil ik graag dat mijn partner de ideale partner is.                              | <input type="radio"/>     | <input type="radio"/> | <input type="radio"/>    | <input type="radio"/>                | <input type="radio"/>  | <input type="radio"/> | <input type="radio"/> |
| Ik kan mij soms storen aan sommige eigenschappen van mijn partner maar dat vind ik op zich niet erg. | <input type="radio"/>     | <input type="radio"/> | <input type="radio"/>    | <input type="radio"/>                | <input type="radio"/>  | <input type="radio"/> | <input type="radio"/> |
| Ik vind het moeilijk om te accepteren dat mijn partner ook minder goede eigenschappen heeft.         | <input type="radio"/>     | <input type="radio"/> | <input type="radio"/>    | <input type="radio"/>                | <input type="radio"/>  | <input type="radio"/> | <input type="radio"/> |

|                                                                                                                | helemaal<br>mee<br>oneens | mee oneens            | een beetje<br>mee oneens | niet mee<br>oneens/ niet<br>mee eens | een beetje<br>mee eens | mee eens              | helemaal mee<br>eens  |
|----------------------------------------------------------------------------------------------------------------|---------------------------|-----------------------|--------------------------|--------------------------------------|------------------------|-----------------------|-----------------------|
| Er zitten ook minder leuke aspecten aan mijn relatie, maar dat vind ik prima.                                  | <input type="radio"/>     | <input type="radio"/> | <input type="radio"/>    | <input type="radio"/>                | <input type="radio"/>  | <input type="radio"/> | <input type="radio"/> |
| Mijn relatie hoeft niet de perfecte relatie te zijn, waarin altijd alles goed gaat.                            | <input type="radio"/>     | <input type="radio"/> | <input type="radio"/>    | <input type="radio"/>                | <input type="radio"/>  | <input type="radio"/> | <input type="radio"/> |
| Als het even wat minder in mijn relatie gaat, vind ik dat moeilijk om te accepteren.                           | <input type="radio"/>     | <input type="radio"/> | <input type="radio"/>    | <input type="radio"/>                | <input type="radio"/>  | <input type="radio"/> | <input type="radio"/> |
| Ik waardeer mijn relatie met mijn partner, ondanks dat er ook minder positieve aspecten zitten aan de relatie. | <input type="radio"/>     | <input type="radio"/> | <input type="radio"/>    | <input type="radio"/>                | <input type="radio"/>  | <input type="radio"/> | <input type="radio"/> |
| Als het even wat minder gaat in onze relatie, wil ik dat zo snel mogelijk veranderen.                          | <input type="radio"/>     | <input type="radio"/> | <input type="radio"/>    | <input type="radio"/>                | <input type="radio"/>  | <input type="radio"/> | <input type="radio"/> |
| In een relatie komt het weleens voor dat                                                                       | <input type="radio"/>     | <input type="radio"/> | <input type="radio"/>    | <input type="radio"/>                | <input type="radio"/>  | <input type="radio"/> | <input type="radio"/> |

|                                                                                                             | helemaal<br>mee<br>oneens | mee oneens            | een beetje<br>mee oneens | niet mee<br>oneens/ niet<br>mee eens | een beetje<br>mee eens | mee eens              | helemaal mee<br>eens  |
|-------------------------------------------------------------------------------------------------------------|---------------------------|-----------------------|--------------------------|--------------------------------------|------------------------|-----------------------|-----------------------|
| je ontevreden bent<br>en dat hoort er bij.<br>Moeilijke tijden<br>horen bij elke relatie<br>en dat is okay. | <input type="radio"/>     | <input type="radio"/> | <input type="radio"/>    | <input type="radio"/>                | <input type="radio"/>  | <input type="radio"/> | <input type="radio"/> |

**20. Geef bij elke stelling aan in hoeverre u het ermee eens of oneens ben**

Kies het toepasselijke antwoord voor elk onderdeel:

|                                                                                                           | helemaal<br>mee<br>oneens | mee oneens            | een beetje<br>mee oneens | niet mee<br>oneens/ niet<br>mee eens | een beetje<br>mee eens | mee eens              | helemaal mee<br>eens  |
|-----------------------------------------------------------------------------------------------------------|---------------------------|-----------------------|--------------------------|--------------------------------------|------------------------|-----------------------|-----------------------|
| Ik ben over het algemeen<br>tevreden met mijn relatie.                                                    | <input type="radio"/>     | <input type="radio"/> | <input type="radio"/>    | <input type="radio"/>                | <input type="radio"/>  | <input type="radio"/> | <input type="radio"/> |
| Ik wil dat mijn relatie nog veel<br>langer duurt.                                                         | <input type="radio"/>     | <input type="radio"/> | <input type="radio"/>    | <input type="radio"/>                | <input type="radio"/>  | <input type="radio"/> | <input type="radio"/> |
| Ik sta over het algemeen positief<br>tegenover mijn relatie.                                              | <input type="radio"/>     | <input type="radio"/> | <input type="radio"/>    | <input type="radio"/>                | <input type="radio"/>  | <input type="radio"/> | <input type="radio"/> |
| Ik voel me emotioneel erg<br>gehecht aan mijn partner.                                                    | <input type="radio"/>     | <input type="radio"/> | <input type="radio"/>    | <input type="radio"/>                | <input type="radio"/>  | <input type="radio"/> | <input type="radio"/> |
| Ik voel me verbonden aan mijn<br>relatie, ook als ik eens wat<br>minder tevreden ben met mijn<br>partner. | <input type="radio"/>     | <input type="radio"/> | <input type="radio"/>    | <input type="radio"/>                | <input type="radio"/>  | <input type="radio"/> | <input type="radio"/> |

|                                                                                                 | helemaal<br>mee<br>oneens | mee oneens            | een beetje<br>mee oneens | niet mee<br>oneens/ niet<br>mee eens | een beetje<br>mee eens | mee eens              | helemaal mee<br>eens  |
|-------------------------------------------------------------------------------------------------|---------------------------|-----------------------|--------------------------|--------------------------------------|------------------------|-----------------------|-----------------------|
| Mijn relatie lijkt op de ideale relatie.                                                        | <input type="radio"/>     | <input type="radio"/> | <input type="radio"/>    | <input type="radio"/>                | <input type="radio"/>  | <input type="radio"/> | <input type="radio"/> |
| Het zou best kunnen dat ik binnen een jaar een kortstondige relatie heb met een andere partner. | <input type="radio"/>     | <input type="radio"/> | <input type="radio"/>    | <input type="radio"/>                | <input type="radio"/>  | <input type="radio"/> | <input type="radio"/> |
| Mijn relatie is veel beter dan relaties van anderen.                                            | <input type="radio"/>     | <input type="radio"/> | <input type="radio"/>    | <input type="radio"/>                | <input type="radio"/>  | <input type="radio"/> | <input type="radio"/> |
| Ik wil mijn relatie graag in stand houden, ook als het eens wat slechter gaat.                  | <input type="radio"/>     | <input type="radio"/> | <input type="radio"/>    | <input type="radio"/>                | <input type="radio"/>  | <input type="radio"/> | <input type="radio"/> |
| Mijn relatie geeft me voldoening en maakt me gelukkig.                                          | <input type="radio"/>     | <input type="radio"/> | <input type="radio"/>    | <input type="radio"/>                | <input type="radio"/>  | <input type="radio"/> | <input type="radio"/> |
| Het zou best kunnen dat mijn relatie eindigt in de nabije toekomst.                             | <input type="radio"/>     | <input type="radio"/> | <input type="radio"/>    | <input type="radio"/>                | <input type="radio"/>  | <input type="radio"/> | <input type="radio"/> |
| Ik ben over het algemeen tevreden met mijn seksleven.                                           | <input type="radio"/>     | <input type="radio"/> | <input type="radio"/>    | <input type="radio"/>                | <input type="radio"/>  | <input type="radio"/> | <input type="radio"/> |
| Ik ben tevreden over hoe vaak mijn partner en ik seks hebben.                                   | <input type="radio"/>     | <input type="radio"/> | <input type="radio"/>    | <input type="radio"/>                | <input type="radio"/>  | <input type="radio"/> | <input type="radio"/> |
| Ik ben tevreden over hoe hartstochtelijk en sensueel onze relatie is.                           | <input type="radio"/>     | <input type="radio"/> | <input type="radio"/>    | <input type="radio"/>                | <input type="radio"/>  | <input type="radio"/> | <input type="radio"/> |

**21. In hoeverre is de volgende stelling op u van toepassing?**

Kies het toepasselijke antwoord voor elk onderdeel:

|                                 | helemaal<br>niet van<br>toepassing | niet van<br>toepassing | nauwelijks<br>van<br>toepassing | enigszins<br>van<br>toepassing | redelijk van<br>toepassing | behoorlijk<br>van<br>toepassing | heel erg van<br>toepassing |
|---------------------------------|------------------------------------|------------------------|---------------------------------|--------------------------------|----------------------------|---------------------------------|----------------------------|
| Ik heb een hoge zelfwaardering. | <input type="radio"/>              | <input type="radio"/>  | <input type="radio"/>           | <input type="radio"/>          | <input type="radio"/>      | <input type="radio"/>           | <input type="radio"/>      |

**22. In elke relatie komt het weleens voor dat er negatieve dingen gebeuren waarbij partners elkaar, bedoeld of onbedoeld, kwetsen, pijn doen, teleurstellen of een regel overtreden. Het kan om iets kleins gaan (bijvoorbeeld een kwetsende opmerking) of iets ernstigs (bijvoorbeeld liegen, een belangrijke afspraak niet nakomen). Hoe gaat u in het algemeen om met zulke negatieve situaties wanneer u zich gekwetst of teleurgesteld voelt door uw partner? Geef bij elke stelling aan in hoeverre u het ermee eens of oneens bent.**

Kies het toepasselijke antwoord voor elk onderdeel:

|                                                                                        | Helemaal<br>mee<br>oneens | Mee oneens            | Een beetje<br>mee oneens | Niet mee<br>oneens, niet<br>mee eens | Een beetje<br>mee eens | Mee eens              | Helemaal mee<br>eens  |
|----------------------------------------------------------------------------------------|---------------------------|-----------------------|--------------------------|--------------------------------------|------------------------|-----------------------|-----------------------|
| Dan blijf ik mijn partner nadragen dat hij/zij iets heeft gedaan wat ik verkeerd vind. | <input type="radio"/>     | <input type="radio"/> | <input type="radio"/>    | <input type="radio"/>                | <input type="radio"/>  | <input type="radio"/> | <input type="radio"/> |
| Dan wil ik de strijdbijl begraven en doorgaan met onze relatie.                        | <input type="radio"/>     | <input type="radio"/> | <input type="radio"/>    | <input type="radio"/>                | <input type="radio"/>  | <input type="radio"/> | <input type="radio"/> |

|                                                                                                         | Helemaal<br>mee<br>oneens | Mee oneens            | Een beetje<br>mee oneens | Niet mee<br>oneens, niet<br>mee eens | Een beetje<br>mee eens | Mee eens              | Helemaal mee<br>eens  |
|---------------------------------------------------------------------------------------------------------|---------------------------|-----------------------|--------------------------|--------------------------------------|------------------------|-----------------------|-----------------------|
| Dan blijf ik het<br>mijn partner<br>moeilijk maken.                                                     | <input type="radio"/>     | <input type="radio"/> | <input type="radio"/>    | <input type="radio"/>                | <input type="radio"/>  | <input type="radio"/> | <input type="radio"/> |
| Dan blijf ik<br>negatief over<br>hem/haar denken.                                                       | <input type="radio"/>     | <input type="radio"/> | <input type="radio"/>    | <input type="radio"/>                | <input type="radio"/>  | <input type="radio"/> | <input type="radio"/> |
| Dan wil ik weer<br>een positieve<br>relatie hebben,<br>ondanks wat mijn<br>partner mij heeft<br>gedaan. | <input type="radio"/>     | <input type="radio"/> | <input type="radio"/>    | <input type="radio"/>                | <input type="radio"/>  | <input type="radio"/> | <input type="radio"/> |
| Dan kan ik mij er<br>moeilijk overheen<br>zetten.                                                       | <input type="radio"/>     | <input type="radio"/> | <input type="radio"/>    | <input type="radio"/>                | <input type="radio"/>  | <input type="radio"/> | <input type="radio"/> |
| Dan heb ik het<br>beste met mijn<br>partner voor,<br>ondanks dat<br>hij/zij mij<br>gekwetst heeft.      | <input type="radio"/>     | <input type="radio"/> | <input type="radio"/>    | <input type="radio"/>                | <input type="radio"/>  | <input type="radio"/> | <input type="radio"/> |
| Dan wil ik dat<br>mijn partner ook<br>op één of andere<br>manier gekwetst<br>wordt.                     | <input type="radio"/>     | <input type="radio"/> | <input type="radio"/>    | <input type="radio"/>                | <input type="radio"/>  | <input type="radio"/> | <input type="radio"/> |

|                                                                       | Helemaal<br>mee<br>oneens | Mee oneens            | Een beetje<br>mee oneens | Niet mee<br>oneens, niet<br>mee eens | Een beetje<br>mee eens | Mee eens              | Helemaal mee<br>eens  |
|-----------------------------------------------------------------------|---------------------------|-----------------------|--------------------------|--------------------------------------|------------------------|-----------------------|-----------------------|
| Dan neem ik afstand mijn partner.                                     | <input type="radio"/>     | <input type="radio"/> | <input type="radio"/>    | <input type="radio"/>                | <input type="radio"/>  | <input type="radio"/> | <input type="radio"/> |
| Dan vergeef ik mijn partner.                                          | <input type="radio"/>     | <input type="radio"/> | <input type="radio"/>    | <input type="radio"/>                | <input type="radio"/>  | <input type="radio"/> | <input type="radio"/> |
| Dan vind ik het moeilijk vinden om aardig tegen mijn partner te doen. | <input type="radio"/>     | <input type="radio"/> | <input type="radio"/>    | <input type="radio"/>                | <input type="radio"/>  | <input type="radio"/> | <input type="radio"/> |
| Dan zet ik mij eroverheen, zodat we samen verder kunnen.              | <input type="radio"/>     | <input type="radio"/> | <input type="radio"/>    | <input type="radio"/>                | <input type="radio"/>  | <input type="radio"/> | <input type="radio"/> |
| Dan vermijd ik mijn partner het liefst.                               | <input type="radio"/>     | <input type="radio"/> | <input type="radio"/>    | <input type="radio"/>                | <input type="radio"/>  | <input type="radio"/> | <input type="radio"/> |
| Dan doe ik net of mijn partner "lucht" is.                            | <input type="radio"/>     | <input type="radio"/> | <input type="radio"/>    | <input type="radio"/>                | <input type="radio"/>  | <input type="radio"/> | <input type="radio"/> |

**23. Hoe reageert u wanneer uw partner is gekwetst of teleurgesteld door u? Geef aan in hoeverre u het met de stelling eens bent.**

Kies het toepasselijke antwoord voor elk onderdeel:

|                                                               | Helemaal<br>mee<br>oneens | Mee<br>oneens         | Een beetje<br>mee<br>oneens | Niet mee<br>oneens, niet<br>mee eens | Een beetje<br>mee eens | Mee eens              | Helemaal mee<br>eens  |
|---------------------------------------------------------------|---------------------------|-----------------------|-----------------------------|--------------------------------------|------------------------|-----------------------|-----------------------|
| Dan maak ik mijn oprechte excuses.                            | <input type="radio"/>     | <input type="radio"/> | <input type="radio"/>       | <input type="radio"/>                | <input type="radio"/>  | <input type="radio"/> | <input type="radio"/> |
| Dan denk ik na over waarom ik het deed.                       | <input type="radio"/>     | <input type="radio"/> | <input type="radio"/>       | <input type="radio"/>                | <input type="radio"/>  | <input type="radio"/> | <input type="radio"/> |
| Dan probeer ik iets te leren van wat ik mijn partner aandeed. | <input type="radio"/>     | <input type="radio"/> | <input type="radio"/>       | <input type="radio"/>                | <input type="radio"/>  | <input type="radio"/> | <input type="radio"/> |
| Dan geef ik mijn partner de schuld van wat ik deed.           | <input type="radio"/>     | <input type="radio"/> | <input type="radio"/>       | <input type="radio"/>                | <input type="radio"/>  | <input type="radio"/> | <input type="radio"/> |
| Dan probeer ik te veranderen wat ik fout deed.                | <input type="radio"/>     | <input type="radio"/> | <input type="radio"/>       | <input type="radio"/>                | <input type="radio"/>  | <input type="radio"/> | <input type="radio"/> |
| Dan vind ik het moeilijk om sorry te zeggen.                  | <input type="radio"/>     | <input type="radio"/> | <input type="radio"/>       | <input type="radio"/>                | <input type="radio"/>  | <input type="radio"/> | <input type="radio"/> |

**24. In relaties komt het voor dat mensen iets met of voor hun partner doen waarin ze niet persoonlijk geïnteresseerd zijn, (d.w.z. iets dat ze eigenlijk niet uit zichzelf zouden doen). Bijvoorbeeld: u gaat mee naar een feestje omdat uw partner er graag heen wil; u doet een vervelend klusje voor uw partner; u praat met uw partner over iets wat u zelf niet interessant vindt.**

Kies het toepasselijke antwoord voor elk onderdeel:

|                                               | Nooit                 | Zeer zelden           | Zelden                | Af en toe             | Regelmatig            | Vaak                  | Heel vaak             |
|-----------------------------------------------|-----------------------|-----------------------|-----------------------|-----------------------|-----------------------|-----------------------|-----------------------|
| Geef aan hoe vaak dit in uw relatie voorkomt. | <input type="radio"/> |



25. In relaties komt het ook voor dat mensen iets voor hun partner opgeven of laten, waarin ze persoonlijk geïnteresseerd zijn (d.w.z. iets wat ze liever wel zouden willen doen). Bijvoorbeeld: u gaat niet uit met vrienden omdat uw partner dat niet wil; u zit niet op uw telefoon in het bijzijn van uw partner omdat uw partner dat niet leuk vindt; u praat niet over iets wat u bezighoudt omdat uw partner dat niet interessant vindt. Kies het toepasselijke antwoord voor elk onderdeel:

|                                               |                       |                       |                       |                       |                       |                       |                       |
|-----------------------------------------------|-----------------------|-----------------------|-----------------------|-----------------------|-----------------------|-----------------------|-----------------------|
|                                               | Nooit                 | Zeer zelden           | Zelden                | Af en toe             | Regelmatig            | Vaak                  | Heel vaak             |
| Geef aan hoe vaak dit in uw relatie voorkomt. | <input type="radio"/> |

26. Als u iets voor uw partner doet of iets opgeeft voor uw partner, zoals hiervoor is beschreven, om welke redenen doet u dit dan?

Kies het toepasselijke antwoord voor elk onderdeel:

|                                                                       |                           |                       |                          |                                      |                        |                       |                       |
|-----------------------------------------------------------------------|---------------------------|-----------------------|--------------------------|--------------------------------------|------------------------|-----------------------|-----------------------|
|                                                                       | Helemaal<br>mee<br>oneens | Mee oneens            | Een beetje<br>mee oneens | Niet mee<br>oneens, niet<br>mee eens | Een beetje<br>mee eens | Mee eens              | Helemaal mee<br>eens  |
| Om de intimiteit in mijn relatie te vergroten.                        | <input type="radio"/>     | <input type="radio"/> | <input type="radio"/>    | <input type="radio"/>                | <input type="radio"/>  | <input type="radio"/> | <input type="radio"/> |
| Om te voorkomen dat mijn partner zijn/haar interesse in mij verliest. | <input type="radio"/>     | <input type="radio"/> | <input type="radio"/>    | <input type="radio"/>                | <input type="radio"/>  | <input type="radio"/> | <input type="radio"/> |
| Om mijn liefde voor mijn partner te uiten                             | <input type="radio"/>     | <input type="radio"/> | <input type="radio"/>    | <input type="radio"/>                | <input type="radio"/>  | <input type="radio"/> | <input type="radio"/> |

|                                                   | Helemaal<br>mee<br>oneens | Mee oneens            | Een beetje<br>mee oneens | Niet mee<br>oneens, niet<br>mee eens | Een beetje<br>mee eens | Mee eens              | Helemaal mee<br>eens  |
|---------------------------------------------------|---------------------------|-----------------------|--------------------------|--------------------------------------|------------------------|-----------------------|-----------------------|
| Om te voorkomen dat ik me schuldig voel.          | <input type="radio"/>     | <input type="radio"/> | <input type="radio"/>    | <input type="radio"/>                | <input type="radio"/>  | <input type="radio"/> | <input type="radio"/> |
| Om mijn partner blij te maken.                    | <input type="radio"/>     | <input type="radio"/> | <input type="radio"/>    | <input type="radio"/>                | <input type="radio"/>  | <input type="radio"/> | <input type="radio"/> |
| Om te voorkomen dat mijn partner overstuur raakt. | <input type="radio"/>     | <input type="radio"/> | <input type="radio"/>    | <input type="radio"/>                | <input type="radio"/>  | <input type="radio"/> | <input type="radio"/> |
| Om mij goed over mezelf te voelen.                | <input type="radio"/>     | <input type="radio"/> | <input type="radio"/>    | <input type="radio"/>                | <input type="radio"/>  | <input type="radio"/> | <input type="radio"/> |
| Om ruzie te voorkomen.                            | <input type="radio"/>     | <input type="radio"/> | <input type="radio"/>    | <input type="radio"/>                | <input type="radio"/>  | <input type="radio"/> | <input type="radio"/> |
| Om de waardering van mijn partner te krijgen.     | <input type="radio"/>     | <input type="radio"/> | <input type="radio"/>    | <input type="radio"/>                | <input type="radio"/>  | <input type="radio"/> | <input type="radio"/> |
| Om te voorkomen dat mijn partner boos wordt.      | <input type="radio"/>     | <input type="radio"/> | <input type="radio"/>    | <input type="radio"/>                | <input type="radio"/>  | <input type="radio"/> | <input type="radio"/> |

27. **Via welk kanaal bent u terecht gekomen bij deze vragenlijst?** Selecteer alle mogelijkheden:

- Via een oproep op een website
- Via Facebook
- Via E-mail
- Via vrienden/bekenden
- Via een ondervrager met een ipad
- Andere:

28. **U heeft aangegeven dat u via een oproep op een website terecht bent gekomen bij deze vragenlijst. Welke website was dit?**

**Beantwoord deze vraag alleen als aan de volgende voorwaarden is voldaan:**

Antwoord was bij vraag '28 [z1]' (Via welk kanaal bent u terecht gekomen bij deze vragenlijst?)

Vul uw antwoord hier in:

**Hartelijk dank voor uw deelname aan deze vragenlijst!**

**Met uw deelname maakt u kans op een waardebon van bol.com ter besteding van €10,-! Heeft u hier interesse in? Vul onderin dan uw e-mailadres in en klik op 'versturen'. Deze gegevens worden uiteraard niet gekoppeld aan de data en zullen niet voor andere doeleinden worden gebruikt. Indien u geen e-mailadres wilt invullen, klik dan direct op 'versturen'.**

Vul uw antwoord hier in:

**Verstuur uw enquête**

**Bedankt voor uw deelname aan deze enquête.**

### **Questionnaire Pilot Study 3 (the original was programmed in LimeSurvey, in English)**

#### **Situations in close relationships**

This online questionnaire is part of a research program on close relationships of Utrecht University and Radboud University (The Netherlands). In this questionnaire, you will be asked to answer questions about a situation in your relationship. You are eligible for participation only if you are 18 years or older and if you are currently in a serious close relationship (for at least 6 months). Only one person per couple can fill in the questionnaire. It will take approximately 10 minutes to fill in the questionnaire.

Please fill in the questionnaire on a computer and not on a mobile phone. It is important that you read the questions carefully and answer them honestly. All answers are anonymous: we will not ask for your name or other identifying information. Participation in this study is voluntary: You can stop at any time. Thanks in advance for your participation.

#### **Informed consent**

**I hereby give permission to use my (anonymous) data for scientific use and will now proceed to the questionnaire.**

Please choose only one of the following:

- Yes, I give permission and will now go to the questionnaire.

#### **Please enter your Prolific ID**

Please write your answer here:

**1. The following statements are about how you usually feel within the relationship with your partner. Indicate the extent to which you agree or disagree with every statement. In my relationship...**

Please choose the appropriate response for each item:

Completely disagree    Disagree    Somewhat disagree    Do not agree or disagree    Somewhat agree    Agree    Completely agree

...I feel loved

...I feel that my partner cares about me

...I feel a lot of distance towards my partner

...I feel related to my partner

...I feel really close with my partner

...It feels like my partner really understands me

...I feel a lot of attachment and intimacy

[ random assignment: ]

**2. Please take a moment to empty your mind, and consider the following:  
Think of a situation (or an aspect, area or time) in your relationship that makes/made you feel authentic with your partner and allows you to express your true self and make your own decisions, in which you can be who you really are, without pretending or feeling pressured to be something that you are not. Please, write down a few sentences about this situation (aspect, area or time) in your relationship where you feel authentic.**

Please write your answer here:

Please use a minimum of 50 words

[ random assignment: ]

**3. Please take a moment to empty your mind, and consider the following:**

**Think of a situation (or an aspect, area or time) in your relationship that makes/made you feel controlled by your partner and does not allow you to express your true self or make your own decisions, in which you cannot be who you really are and instead have to pretend or feel pressured to be something you are not. Please, write down a few sentences about this situation (aspect, area or time) in your relationship where you feel controlled.**

Please write your answer here:

Please use a minimum of 50 words

**4. The following statements are about how you usually feel within the relationship with your partner. Indicate the extent to which you agree or disagree with every statement. In my relationship...**

Please choose the appropriate response for each item:

Completely disagree    Disagree    Somewhat disagree    Do not agree or disagree    Somewhat agree    Agree    Completely agree

...I feel free to be who I am

...I have a say in what happens in my relationship

...I feel controlled and pressured to be certain ways

...I feel like I am free to make my own decisions

...I feel I can pretty much be myself in daily situations

...I feel free to express my feelings, ideas and opinions

...I feel I have to pretend to be someone other than I really am

...I feel free to do things for myself when I feel like it

...It feels as if my partner expects me to do everything the way (s)he wants

...It feels as if my partner always wants to have the last say in how we do things in our relationship

...I feel like I am free to decide what I do and how I do it

**5. How positive or negative do you feel about your relationship at this moment?**

Please choose only one of the following:

- Very negative
- Negative
- Somewhat negative
- Not positive or negative
- Somewhat positive
- Positive
- Very positive

**Personal information**

**6. What is your age in years?**

Please write your answer here:

**7. What is your gender?**

Please choose only one of the following:

- Male
- Female
- Other

**8. What gender is your partner?**

Please choose only one of the following:

- My partner is of the same gender as me
- My partner is of the opposite gender
- Other

**9. What is your relationship status?**

Please choose only one of the following:

- Married
- Cohabiting
- Other

**10. How long have you been in a relationship with your current partner?** Round off to half years and please use a comma (for example 7,5).

Please write your answer here:

**11. What is the highest level of education that you have completed?**

Please choose only one of the following:

- Primary/secondary education
- Lower vocational education
- Intermediate vocational education – Junior/community college (associate's degree)
- Higher vocational education – College/university (undergraduate/bachelor's degree)
- University education – graduate/master's degree
- PhD/doctorate degree
- Other



**12. What is your racial/ethnic background?**

Please choose only one of the following:

- Asian (including Indian)
- Black/African-American
- Native American/American Indian
- Native Hawaiian/ Pacific Islander
- Hispanic/Latino
- White/Caucasian
- Other

**Thank you for filling in the questionnaire.**

1) Please use ctrl + click on this completion URL to prove in Prolifics that you have completed the study:

<https://prolific.ac/submissions/complete?cc=OGLKJ8QZ>

2) After that, click on submit to complete the study in this program.

**If you have any remarks, please let us know.**

Please write your answer here:

**Submit your survey.**

**Thank you for completing this survey.**

### **Questionnaire Study 3 (the original was programmed in LimeSurvey, in English)**

This online questionnaire is part of a research program on close relationships of Utrecht University and Radboud University (The Netherlands). In this questionnaire, you will be asked questions about your relationship. You are eligible for participation only if you are 18 years or older and if you are currently in a serious close relationship (for at least 6 months). Only one person per couple can fill in the questionnaire. It will take approximately 15 minutes to fill in the questionnaire.

Please fill in the questionnaire on a computer and not on a mobile phone. It is important that you read the questions carefully and answer them honestly. All answers are anonymous: we will not ask for your name or other identifying information. Participation in this study is voluntary: You can stop at any time. Thanks in advance for your participation.

#### **Informed consent**

**I hereby give permission to use my (anonymous) data for scientific use and will now proceed to the questionnaire.**

Please choose only one of the following:

- Yes, I give permission and will now go to the questionnaire.

#### **Please enter your Prolific ID**

Please write your answer here:

**1. The following statements are about how you usually feel within the relationship with your partner. Indicate the extent to which you agree or disagree with every statement.**

**In my relationship...**

Please choose the appropriate response for each item:

Completely disagree    Disagree    Somewhat disagree    Do not agree or disagree    Somewhat agree    Agree    Completely agree

...I feel loved

...I feel that my partner cares about me

...I feel a lot of distance towards my partner

...I feel related to my partner

...I feel really close with my partner

...It feels like my partner really understands me

...I feel a lot of attachment and intimacy

[ Random assignment ]

**Please take a moment to empty your mind, and consider the following:**

**Think of a situation (or an aspect, area or time) in your relationship that makes/made you feel authentic with your partner and allows you to express your true self and make your own decisions, in which you can be who you really are, without pretending or feeling pressured to be something that you are not. Please, write down a few sentences about this situation (aspect, area or time) in your relationship where you feel authentic.**

Please write your answer here:

Please use a minimum of 50 words

[ Random assignment ]

**Please take a moment to empty your mind, and consider the following:**

**Think of a situation (or an aspect, area or time) in your relationship that makes/made you feel controlled by your partner and does not allow you to express your true self or make your own decisions, in which you cannot be who you really are and instead have to pretend or feel pressured to be something you are not. Please, write down a few sentences about this situation (aspect, area or time) in your relationship where you feel controlled.**

Please write your answer here:

Please use a minimum of 50 words

**2. The following statements are about how you usually feel within the relationship with your partner. Indicate the extent to which you agree or disagree with every statement.**

**In my relationship...**

Please choose the appropriate response for each item:

Completely disagree    Disagree    Somewhat disagree    Do not agree or disagree    Somewhat agree    Agree    Completely agree

...I feel free to be who I am

...I feel controlled and pressured to be certain ways

...I feel like I am free to make my own decisions

...I feel I have to pretend to be someone other than I really am

...It feels as if my partner expects me to do everything the way (s)he wants

...It feels as if my partner always wants to have the last say in how we do things in our relationship

...I feel like I am free to decide what I do and how I do it

**3. How positive or negative do you feel about your relationship at this moment?**

Please choose only one of the following:

- Very negative
- Negative
- Somewhat negative
- Not positive or negative
- Somewhat positive
- Positive
- Very positive

**4. Read each of the following statements about the way you react to negative behaviour of your partner, and indicate to what extent you agree with it.**

**If my partner would behave rude, unpleasant, mean or thoughtless towards me...**

Please choose the appropriate response for each item:

Completely disagree    Disagree    Somewhat disagree    Do not agree or disagree    Somewhat agree    Agree    Completely agree

I would threaten to leave him/her

I would try to resolve the situation and improve conditions

I would forgive my partner and forget about it

I would avoid dealing with the situation

I would feel so angry I want to walk right out the door

I would calmly discuss things with him/her

I would patiently wait for things to improve

I would sulk and don't confront the issue

I would do something equally unpleasant in return

I would try to patch things up and solve the problem

I would hang in there and wait for his/her mood to change – these times pass

I would ignore the whole thing

I would do things to drive my partner away

I would spend less time with him/her

I would talk to my partner about what's going on, trying to work out a solution

I would give him/her the benefit of the doubt and forget about

**5. Please think about your romantic partner and rate the extent to which you feel each of the following at this moment.**

Please choose the appropriate response for each item:

Completely disagree   Disagree   Somewhat disagree   Do not disagree or agree   Somewhat agree   Agree   Completely agree

My partner does not have to be the perfect partner

I try to change the things which I do not like about my partner

I can accept the less pleasant characteristics of my partner

Frankly, I would like my partner to be the ideal partner

I find it hard to accept that my partners also has less pleasant characteristics

**6. Please think about your romantic partner and rate the extent to which you feel each of the following at this moment.**

Please choose the appropriate response for each item:

Not at all   A little   Somewhat   A lot   A great deal

At this moment, I feel a great deal of sexual desire for my partner

At this moment, I am interested in having sex with my partner

At this moment, I would like to kiss my partner passionately

At this moment, I fantasize about having sex with my partner

At this moment, I perceive my partner as sexually desirable

At this moment, I am passionately attracted to my partner

At this moment, I'd like to be physically close to my partner

### **Personal information**

#### **7. What is your age in years?**

Please write your answer here:

#### **8. What is your gender?**

Please choose only one of the following:

- Male
- Female
- Other

#### **9. What gender is your partner?**

Please choose only one of the following:

- My partner is of the same gender as me
- My partner is of the opposite gender
- Other



**10. What is your relationship status?**

Please choose only one of the following:

- Married
- Cohabiting
- Other

**11. How long have you been in a relationship with your current partner?** Round off to half years and please use a comma (for example 7,5).

Please write your answer here:

**12. What is the highest level of education that you have completed?**

Please choose only one of the following:

- Primary/secondary education
- Lower vocational education
- Intermediate vocational education – Junior/community college (associate's degree)
- Higher vocational education – College/university (undergraduate/bachelor's degree)
- University education – graduate/master's degree
- PhD/doctorate degree
- Other

**13. What is your racial/ethnic background?**

Please choose only one of the following:

- Asian (including Indian)
- Black/African-American
- Native American/American Indian
- Native Hawaiian/ Pacific Islander
- Hispanic/Latino
- White/Caucasian
- Other

**Thank you for filling in the questionnaire.**

1) Please use ctrl + click on this completion URL to prove in Prolifics that you have completed the study:  
<https://prolific.ac/submissions/complete?cc=OGLKJ8QZ>

2) After that, click on submit to complete the study in this program.

**If you have any remarks, please let us know.**

Please write your answer here:

**Submit your survey.**

**Thank you for completing this survey.**
